1           **Downregulation of Neurodevelopmental Gene Expression in iPSC-Derived Cerebral**  
2                           **Organoids Upon Infection by Human Cytomegalovirus**

3

4 Benjamin S. O'Brien<sup>1</sup>, Rebekah L. Mokry<sup>2</sup>, Megan L. Schumacher<sup>2</sup>, Kirthi Pulakanti<sup>3</sup>, Sridhar  
5 Rao<sup>1,3</sup>, Scott S. Terhune<sup>2</sup>, Allison D. Ebert<sup>1</sup>

6

7 1. Department of Cell Biology, Neurobiology, and Anatomy, Medical College of Wisconsin,  
8 Milwaukee, Wisconsin, United States

9 2. Department of Microbiology and Immunology, Medical College of Wisconsin, Milwaukee,  
10 Wisconsin, United States

11 3. Laboratory of Stem Cell Transcriptional Regulation, Blood Research Institute, Blood Center of  
12 Wisconsin, Milwaukee, United States

13

14 Corresponding author: [aebert@mcw.edu](mailto:aebert@mcw.edu)

15

16 Keywords: Neural progenitor cells, RNAseq, cytomegalovirus, organoids, immediate early genes

17 **Abstract**

18 Human cytomegalovirus (HCMV) is a beta herpesvirus that, upon congenital infection, can cause  
19 severe birth defects including vision and hearing loss, microcephaly, and seizures. Currently, no  
20 approved treatment options exist for in utero infections. We previously demonstrated that HCMV  
21 infection decreases calcium signaling responses and alters neuronal differentiation in induced  
22 pluripotent stem cell (iPSC) derived neural progenitor cells (NPCs). Here we aimed to determine  
23 the impact of infection on the transcriptome in developing human neurons using iPSC-derived 3-  
24 dimensional cerebral organoids. We infected iPSC-derived cerebral organoids with HCMV  
25 encoding eGFP and sorted cell populations based on GFP signal strength. Significant  
26 transcriptional downregulation was observed including in key neurodevelopmental gene pathways  
27 in both the GFP (+) and intermediate groups. Interestingly, the GFP (-) group also showed  
28 downregulation of the same targets indicating a mismatch between GFP expression and viral  
29 infection. Using a modified HCMV virus destabilizing IE 1 and 2 proteins, we still observed  
30 significant downregulation of neurodevelopmental gene expression in infected neural progenitor  
31 cells. Together, these data indicate that IE viral proteins are not the main drivers of  
32 neurodevelopmental gene dysregulation in HCMV infected neural tissues suggesting  
33 therapeutically targeting IE gene expression is insufficient to restore neural differentiation and  
34 function.

## 35 **Introduction**

36 Human cytomegalovirus (HCMV) is a beta-herpesvirus with a 235-kbp double-stranded  
37 DNA (dsDNA) genome and the potential to express more than 700 proteins (Mocarski and Kemble  
38 1996; Mocarski 2007). The virus infects a majority of the world's population with seroprevalence  
39 of 40-100% depending on age, socio-economic status and geographic location (Sinzger et al. 2008;  
40 Griffiths et al. 2015). Infection by HCMV is lifelong and can result in a range of conditions.  
41 Vertical transmission can also occur causing congenital CMV (cCMV) infection (Mocarski and  
42 Kemble 1996; Griffiths et al. 2015). A portion of babies born with cCMV infection will have long-  
43 term health problems including vision and hearing loss, microcephaly, and seizures. Neurological  
44 symptoms are likely the result of infection of neural progenitor cells (NPCs) (Luo et al. 2008;  
45 Hindley et al. 2012; Sun et al. 2020). In vitro, NPCs derived from both induced pluripotent stem  
46 cells (iPSCs) and fetal stem cells are fully permissive for HCMV infection, though susceptibility  
47 depends upon degree of NPC terminal differentiation (Odeberg et al. 2006; Luo et al. 2010; Pan et  
48 al. 2013; Gonzalez-Sanchez et al. 2015). In the fetal brain, NPCs are located in the bilateral  
49 subventricular zone aligned with the developing ventricle, and these cells express a number of key  
50 transcription factors that are required for maintenance of the progenitor cell pool and subsequent  
51 differentiation. NPCs can differentiate into the multiple neuronal and glial lineages found in the  
52 central nervous system (CNS). HCMV infection of NPCs has been shown to alter differentiation  
53 and function (Luo et al. 2010; Liu et al. 2017a; Wu et al. 2018; Brown et al. 2019). However, the  
54 mechanisms controlling this remain to be fully established.

55 Upon infection, the HCMV genes are expressed in three sequential steps known as  
56 immediate early (IE), early (E), and late (L). Viral IE gene expression can be detected within hours  
57 of infection and total viral replication occurs within approximately 96 hours post infection (hpi)

58 (Mocarski 2007; Marcinowski et al. 2012; Griffiths et al. 2015). In general, IE proteins are  
59 responsible for inhibiting intrinsic and innate host cell responses and initiating the transcription of  
60 viral early genes. Viral early genes then regulate host cell function to allow for viral genome  
61 replication and packaging (Griffiths et al. 2015; Xu et al. 2018). Late viral genes are expressed  
62 after viral DNA replication has begun and encode mostly structural proteins required for egress  
63 (Mocarski 2007; Perng et al. 2011; D'Aiuto et al. 2012; Tirosh et al. 2015). Following primary  
64 infection, the virus may remain lytic, replicating and activating the immune system, or enter a  
65 latent stage lacking replication and immune system activation (Griffiths et al. 2015). HCMV can  
66 replicate in differentiated cell types to varying degrees (Marcinowski et al. 2012; Pan et al. 2013;  
67 Gonzalez-Sanchez et al. 2015). In symptomatic children and adults, HCMV infection can be  
68 managed using (val)ganciclovir, cidofovir, and/or foscarnet, all of which inhibit viral DNA  
69 synthesis, or letermovir, which targets viral DNA packaging into nucleocapsids (Britt and Prichard  
70 2018; Pass and Arav-Boger 2018; Altman et al. 2019; Steingruber and Marschall 2020). There is  
71 no FDA-approved therapy for treating expecting mothers, making vaccine development a major  
72 public health priority. Clinical trials are being conducted for use of valganciclovir in infants and  
73 children with confirmed symptomatic and asymptomatic cCMV infections.

74 Initial human microarray experiments using RNA isolated from HCMV-infected NPCs  
75 identified several downregulated neurodevelopmental genes such as NES, SOX2/4, and OLIG1  
76 along with disruptions to differentiation (Luo et al. 2010; D'Aiuto et al. 2012). A subsequent  
77 mechanistic study in NPCs demonstrated the ability for viral protein IE1 to cause the loss of SOX2  
78 expression through trapping of unphosphorylated STAT3 in the nucleus (Wu et al. 2018).  
79 Meanwhile, recent RNAseq studies conducted in HCMV-infected cerebral organoids support these  
80 findings identifying SOX2, OLIG1, ENO2, ALDOC, and FEZF2 among other downregulated

81 neurodevelopmental genes (Brown et al. 2019; Sun et al. 2020). These studies also found  
82 upregulation in ontology terms interleukin, inflammatory, and immune response with  
83 downregulation in ontology terms axonogenesis, calcium regulation, and glycolytic processes (Sun  
84 et al. 2020). Further, this work identifies the potential interaction of the PDGFRa receptor and viral  
85 pentameric complex in promoting virus entry into NPCs (Rak et al. 2018; Sun et al. 2020). It also  
86 found that administration of HCMV neutralizing antibody (NAbs) was sufficient to prevent  
87 infection and disruptions to structural development within the organoid (Sun et al. 2020).  
88 Additional work from us and others using the cerebral organoid model have found consistent  
89 disruptions to neuronal differentiation, cortical layering, calcium signaling, and electrical activity  
90 after HCMV infection (Brown et al. 2019; Sison et al. 2019; Sun et al. 2020).

91         In the current study we aim to identify neurodevelopmental transcriptional networks that  
92 are altered in response to HCMV infection and whether specific viral proteins contribute to gene  
93 misregulation. We found transcriptional downregulation among many genes which was not limited  
94 to cells expressing high levels of GFP, a surrogate marker of viral replication and was observed  
95 throughout the infected tissue. Previous studies have suggested that HCMV IE1 viral protein  
96 expression can regulate host gene expression (Marcinowski et al. 2012; Khan et al. 2014; Pignoloni  
97 et al. 2016; Liu et al. 2017b; Adamson and Nevels 2020). We found this to be the case for some  
98 gene targets, while regulation of others appeared to be independent of IE1/2 protein expression  
99 suggesting that other HCMV-related mechanisms are involved. Together, this work reveals that  
100 limiting IE gene expression offers minimal benefit on neural differentiation and function  
101 suggesting that therapeutic development against cCMV infection will require a more  
102 comprehensive approach.

## 103 **Results**

### 104 **Cells from infected neural organoids exhibit reduced transcriptional profiles despite varying** 105 **levels of viral gene expression.**

106 Human iPSC-derived cerebral organoids were generated from two independent healthy  
107 control iPSC lines (Ebert et al. 2013; Sison et al. 2019) and infected after 30 days of development  
108 with a recombinant HCMV strain TB40/E expressing EGFP. Because tissues varied in size and  
109 likely cell numbers, we infected organoids using 500 infectious units per  $\mu\text{g}$  of tissue (IU/ $\mu\text{g}$ ) and  
110 allowed infection to progress for two weeks. We detected GFP fluorescence by 4 days post  
111 infection (dpi), increased at 8 dpi, and continued to be present at 12 dpi indicating viral spread  
112 (Fig. 1A). At 14 dpi, HCMV-infected and mock-treated uninfected organoids (Fig. 1B) were  
113 dissociated into single cell suspensions, and cells were sorted based on levels of GFP fluorescence  
114 as an indirect measurement of infection (Fig. 1C). The gating parameters for live cells were set  
115 based on cells isolated from uninfected mock-treated organoids (Fig. S1). This approach is  
116 routinely used to investigate latency in HCMV-infected hematopoietic cells (Rak et al. 2018). The  
117 EGFP gene is present within the viral genome and expressed using an SV40 promoter, and  
118 fluorescence is postulated to be proportional to transcriptionally competent HCMV genomes (Rak  
119 et al. 2018; Collins-McMillen et al. 2019). We sorted cells into groups exhibiting high,  
120 intermediate, and undetectable levels of fluorescence (Fig. 1C). We defined these populations as  
121 GFP positive (+), GFP intermediate (Inter), and GFP negative (-). For example, the total number  
122 of live cells from a representative experiment was approximately  $3.5 \times 10^6$  which consisted of  $0.5$   
123  $\times 10^6$  GFP (-) cells,  $2 \times 10^6$  GFP (Inter) cells, and  $1 \times 10^6$  GFP (+) cells (Fig. 1C). Infection did not  
124 cause large scale cell death as we observed that the number of live cells within each infected  
125 organoid group were comparable to the uninfected mock group (Fig. 1D). High expression of GFP

126 likely represents a population of cells exhibiting high viral genome copies and viral gene  
127 expression. In contrast, cells isolated based on the absence of fluorescence are anticipated to be  
128 uninfected, or perhaps newly infected with fluorescence below the threshold of detection. To  
129 address these differences, we quantified levels of HCMV gene classes, immediate early (IE;  
130 UL123, UL122), early-late (E-L; UL44) and late (L; UL99) with late expression dependent on  
131 viral genome synthesis (Chambers et al. 1999). Cell populations of GFP (+) and GFP (Inter)  
132 exhibited high levels of viral gene expression in all classes with differences consistent with their  
133 levels of fluorescence (Fig. 1E). In the GFP (-) group, we did observe low but statistically  
134 significant levels of viral IE RNAs (Fig.1E) likely representing a mixture of uninfected and newly  
135 infected cells within the tissues.

136 We quantified infection-induced changes to host cell gene expression using RNA  
137 sequencing on sorted cell populations from infected organoids and sorted cells isolated from  
138 uninfected Mock-treated tissues. These studies were completed using three biological replicate  
139 experiments that were sequenced separately with multiple organoids combined for each condition.  
140 Mock and infected samples were mixed for each biological replicate resulting in the pooled library.  
141 Samples had at least 2.5 million aligned reads and the External RNA Controls Consortium (ERCC)  
142 spike-in was used to normalize variation in RNA expression across samples. After trimming, 80%  
143 of the bases had a quality score of 30 indicating the probability of an incorrect base call was 1 in  
144 1000. One of the GFP (+) replicates was removed from our subsequent analysis due to a large drop  
145 off in total number of mapped reads likely related to technical error in the sequencing reaction.  
146 Initially, we performed principal component analysis (PCA) on the data sets which revealed two  
147 groups (Fig. 2A). One group contained the Mock-treated samples, and the other contained samples  
148 isolated from infected organoids regardless of GFP signal strength (Fig. 2A). This was initially

149 surprising as we hypothesized that the subpopulations from infected organoids would cluster  
150 separately based on varying states of infection. However, as noted above, we did detect low levels  
151 of viral transcripts in the GFP (-) group indicating this population contains some infected cells.  
152 These data also suggest a possible indirect effect of HCMV on uninfected cells in the tissues.

153 We identified 1,222 cellular transcripts upregulated, 17,696 downregulated, and 2,882 not  
154 differentially expressed in GFP (+) cells from HCMV-infected tissues compared to cells from  
155 Mock tissues, using an adjusted p-value  $< 0.05$  and 3-fold cutoff. In the GFP (-) population, we  
156 observed 911 transcripts upregulated and 18,379 downregulated compared to Mock. Table S1 and  
157 S2 contain full gene lists from DESEQ2 analysis along with a gene list of those not differentially  
158 expressed for GFP (+) vs Mock and GFP (-) vs Mock, respectively. Completion of hierarchical  
159 cluster analysis on the top 500 variable genes across samples showed distinct clustering between  
160 infected samples and mock samples (Fig. 2B, left), and we did not observe any additional  
161 clustering based on GFP designation following the removal of the mock data sets (Fig. 2B, right).  
162 These differences are shown in volcano plots for GFP (+) versus Mock and GFP (-) versus Mock  
163 (Fig. 2C) illustrating the disproportional number of genes being downregulated. For both GFP (+)  
164 and GFP (-) groups, over 90% of significantly differentially expressed genes were downregulated  
165 compared to cells isolated from uninfected Mock tissues. These observations demonstrate that  
166 HCMV infection profoundly impacts transcription of infected cells in neural tissues and supports  
167 a hypothesis that changes are occurring at very early times of infection (i.e., GFP (-) populations)  
168 and likely also involves indirect effects on uninfected cells from the neighboring GFP (+) infected  
169 cells.

170



171 **Cell populations from HCMV-infected organoids display downregulation in critical**  
172 **neurodevelopmental and signaling genes.**

173 To determine which biological processes are disproportionately altered in response to  
174 infection, we began by analyzing the complete data sets using Gene Set Enrichment Analysis  
175 (GSEA) that defines significant differences between two biological states in hallmark gene sets  
176 related to specific biological processes. Full gene lists for each analyzed gene set and rank metrics  
177 can be found in Supplemental Table 3. Compared to HCMV-infected GFP (+) cells, GSEA  
178 identified enrichment in genes up-regulated in response to alpha interferon proteins (Fig. 3A). We  
179 have included a representative heatmap of 40 genes out of the 97 hallmark genes in this category  
180 (Fig. 3A). This interferon response is known to occur during HCMV infection (Boyle et al. 1999;  
181 Paulus et al. 2006). Although GFP (+) and GFP (-) populations clustered together, this hallmark  
182 gene set was not significantly enriched in HCMV-infected GFP (-) compared to Mock (Fig. 3A).  
183 In contrast, HCMV-infected GFP (+) cells exhibited negative correlation and dysregulation in  
184 several sets (Fig.3B). This included genes up-regulated during the unfolded protein response, a  
185 subgroup of genes regulated by MYC, genes involved in the G2/M checkpoint, genes up-regulated  
186 in response to TGF $\beta$ 1, and genes up-regulated by activation of the PI3K/AKT/mTOR pathway.  
187 Disruption to genes involved with MYC, TGF $\beta$ 1, and AKT signaling in the GFP (+) population is  
188 likely related to infection causing an arrest in cell proliferation. We have included heatmaps of 40  
189 genes within each hallmark set to further demonstrate that most genes were downregulated upon  
190 infection (Fig 3B). Our lab and others have demonstrated HCMV-mediated dysregulating of  
191 several of these processes in 2D cultures of primary human fibroblasts with many of the activities  
192 dysregulated by HCMV immediate early genes (Michelson et al. 1994; Jault et al. 1995;  
193 Kudchodkar et al. 2006; Moorman et al. 2008).

194           Next, we used gene ontology enrichment analysis to more precisely map specific processes  
195 that are impacted during infection. We analyzed the top 3,000 differentially expressed genes, both  
196 increased and decreased, between cells isolated from HCMV-infected GFP (+) and Mock-treated  
197 organoids. As noted earlier, most expression was downregulated in infected populations. Using a  
198 p-value cutoff of < 0.01, gene ontology (GO) analysis identified significant changes in 804 terms  
199 related to biological processes, 95 molecular functions, and 201 cellular components. The top five  
200 statistically significant terms are shown in Figure 5A with full lists in Table S5 and additional  
201 enriched terms in Figure S3 (additional ontology analysis performed using DAVID is found in  
202 Figure S3). The GO terms Ion Signaling, Cell-Cell Communication, and Junction Signaling were  
203 all significantly affected in HCMV GFP (+) cells (Fig. 4B). For example, we observed a 10.9-fold  
204 reduction in expression of GJA1, 7.8-fold reduction in CACNA1C, 5.7-fold reduction in  
205 CACNA1G, 5.4-fold for CAMKV, and 5.8-fold for KCNF1. We observed similar changes in the  
206 GFP (-) group compared to Mock, with GJA1 reduced by 11.2-fold, CACNA1C by 4.7-fold,  
207 CACNA1G by 5.6-fold and CAMKV by 7.1-fold (data not shown). KCNF1 was also  
208 downregulated but not significantly in the GFP (-) group. These data are consistent with previous  
209 studies demonstrating reduced expression of neuron-specific ion channel subunits and gap  
210 junctions (Luo et al. 2010; Khan et al. 2014) as well as our previous studies demonstrating reduced  
211 Ca<sup>2+</sup> signaling in 2D NPC cultures and cells derived from HCMV-infected organoids (Sison et al.  
212 2019).

213           We observed significant changes in the GO category Nervous System Development (Fig.  
214 4B). In the GFP (+) cells compared to Mock, we quantified a 9.7-fold reduction in SOX2, 8.3-fold  
215 in FOXP1, 8.4-fold in DMRTA2, 7.8-fold in EMX1, and 9.5-fold in FEZF2. In GFP (-) cells,  
216 SOX2 decreased by 9.1-fold, FOXP1 by 7.5-fold, and FEZF2 by 8.5-fold while no significant

217 changes occurred in DMRTA and EMX. Numerous additional developmental genes that were  
218 significantly reduced in both GFP (+) and GFP (-) include HES1, PAX6, and NEUROG1 and G2  
219 (Fig. 4B). The decrease in several of these transcription factors has been observations made in  
220 HCMV-infected NPCs (Luo et al. 2008; Luo et al. 2010; Li et al. 2015), and we have now expanded  
221 the observations to changes occurring within the context of a more complex 3D tissue model  
222 system.

223 The remaining most significantly enriched terms included cell cycle, cellular component  
224 organization, and RNA/protein binding (Fig. 5A) with several genes spanning multiple categories.  
225 Examples of genes related to cell cycle included NPM1 and PP2R1A, to cellular organization  
226 include NEFL and DPYSL2, and to RNA-protein binding include EEF2 and RPL3 (Fig. 4B). A  
227 complete list of GO terms enriched using the top 5,000 differentially expressed genes for GFP (+)  
228 and GFP (-) vs Mock as determined by adjusted p value of  $< 0.025$  and fold change of  $> 5$  are  
229 presented in Figure S3. We observed conservation of enriched terms between GFP (+) and GFP (-  
230 ) populations including processes regulating protein expression, neuron differentiation, cellular  
231 component organization, and cell cycle.

232 Finally, we sought to define specific pathways using the Ingenuity Pathway Analysis tool.  
233 We analyzed the top 3,000 differentially expressed genes which defined 12 pathways as  
234 significantly altered during infection (Fig. 4C). Most pathway components are downregulated and  
235 consistent with results from the GO analysis. Several of these pathways involve regulating protein  
236 translation and degradation including protein ubiquitination, signaling relating to BAG2, EIF2  
237 signaling, regulation of EIF4 and p70S6K, and mTOR signaling (Fig. S4A). Others related to  
238 neurodevelopmental processes such as Synaptogenesis Signaling Pathway and Huntington's  
239 Disease signaling (Fig. S4A). Meanwhile, RHOGDI signaling was one of a few pathways

240 containing several upregulated components and many of the unchanged genes between GFP (+)  
241 and Mock related to GPCR signaling (Fig. S4B). Finally, IPA's core analysis tool generated a node  
242 diagram connecting regulators from the major affected canonical pathways (Fig. S5). Several of  
243 these regulators fall into identified ontology classifications (TGFB1, RICTOR, NGF, and SP1)  
244 and have impacts on functional pathways that match our previous analyses. Complete analyses  
245 from IPA comparing GFP (+) vs Mock can be found in Supplemental Table S4.

246

### 247 **Impact of HCMV replication on neurodevelopment gene expression.**

248 The GFP (-) cell populations isolated from infected neural organoids exhibit profound  
249 changes in host transcriptomes. These GFP (-) cells exhibit low levels of HCMV IE gene  
250 expression, and (Wu et al. 2018) have demonstrated that expression of HCMV IE1 disrupts SOX2  
251 expression in a STAT3-dependent mechanism (Reitsma et al. 2013). Therefore, we hypothesized  
252 that expression of viral proteins IE1 and possibly IE2 might be necessary to downregulate other  
253 key neurodevelopmental genes identified by our RNA seq experiments. To test their contributions,  
254 we infected cultures of NPCs using TB40r mGFP-IE-FKBP virus that expresses IE1 and IE2 with  
255 a destabilization domain (DD) tag in a shared exon (Glass et al. 2009). Addition of Shield1 ligand  
256 to the culture media prevents DD-dependent IE1 and IE2 degradation and increases its steady-state  
257 levels (Glass et al. 2009). We cultured neurosphere-derived NPCs for 3 and 7 days prior to  
258 infection to mimic developmental states. Cells were infected using TB40r mGFP-IE-FKBP at an  
259 MOI of 1.0 IU/cell, based on titers from fibroblasts, and we added 1  $\mu$ M Shield1 ligand (Shield  
260 (+)) or vehicle (Shield (-)) starting at 2 hpi. We quantified changes in HCMV gene expression and  
261 observed significant reductions in IE RNAs UL123 (IE1) and UL122 (IE2) at all time points in  
262 Shield (-) compared to Shield (+) (Fig. 5A). Reductions in RNA levels for UL44 and UL99 also

263 occurred (Fig. 5B), and these differences were observed for infections done using Day 7 NPCs  
264 (Fig. 5A, B). We observed IE1-positive nuclei using immunofluorescence in Shield (+) but not  
265 Shield (-), albeit lower than the anticipated number of infected cells (Fig. 5C). Shield (+) IE1-  
266 positive cultures also exhibited reductions in TUJ1 and HES1, which is consistent with published  
267 studies (Liu et al. 2017b; Brown et al. 2019; Sun et al. 2020). Our data demonstrate that NPCs  
268 infected in the absence of Shield1 exhibit reduced HCMV IE1 protein and gene expression by 24  
269 hpi as well as disruptions to additional viral gene classes.

270 We next asked whether destabilizing IE1 and IE2 in Shield (-) conditions could limit the  
271 downregulation of key developmental and transcription factors which we observed in GFP (+) and  
272 GFP (-) organoid populations. We infected NPCs as described above and measured differences in  
273 cellular gene expression of the nervous system developmental genes FEZF2, FOXP1, DMRTA1,  
274 and EMX1 in the Shield (+) and Shield (-) conditions (Fig. 6). We observed significant reductions  
275 in FEZF2 and FOXP1 RNA levels by 24 hpi in Day 3 NPCs, and by 48 hpi in Day 7 NPCs  
276 regardless of Shield1 (Fig. 6A). Changes in DMRTA2 and EMX1 occurred late during infection  
277 of Day 3 NPCs but was detectable by 24 hpi in Day 7 NPCs (Fig. 6B). There were some differences  
278 between Shield (+) and (-) conditions, but our data show that limiting IE1/IE2 protein expression  
279 was not sufficient to prevent the downregulation of any of the key neurodevelopmental targets  
280 explored. We next investigated a set of ion signaling, cell-cell communication and junctional  
281 organizational genes (Fig. 4B), specifically KCNF1, CACNA1C, CAMKV, CACNA1G, and  
282 GJA1 (Fig. 7). We consistently observed small decreases in calcium channel genes, KCNF1 and  
283 CACNA1C at late time points independent of Shield addition (Fig. 7A). Likewise, we observed  
284 decreases in CAMKV, CACNA1G, and GJA1. However, a Shield-dependent effect was noted  
285 particularly in the case of GJA1 and CAMKV (Fig. 7B,C). Together with our previous results

286 (Sison et al. 2019), our data confirm that HCMV mediated a disruption of several key  
287 neurodevelopmental and functional genes (Fig. 7D), but this effect has limited dependence on  
288 expression of IE1 and IE2.

289

## 290 **Discussion**

291 Stem cell-derived organoids provide a unique model system in which to study the  
292 developing human brain. For example, their 3D structure more closely represents the developing  
293 brain compared to 2D monolayer culture system and allows for the generation of a layered cortical  
294 structure expressing a wide variety of the markers associated with the human brain (Lancaster et  
295 al. 2013; Xu et al. 2018; Sison et al. 2019). We and others have previously demonstrated that  
296 cerebral organoids can be infected by HCMV with infection substantially altering organoid  
297 structure and function (Brown et al. 2019; Sison et al. 2019; Sun et al. 2020) (Figure 7D). However,  
298 a more thorough examination of how the transcriptional landscape is altered upon HCMV infection  
299 and what role viral proteins play in this process is needed to better understand the overall impact  
300 of HCMV infection on neural development.

301 Neurodevelopment is a highly complex process dependent on both spatial and temporal  
302 cues that activate large transcription factor networks within the NPC population. Ultimately, these  
303 cues cause NPCs to develop into a variety of terminally differentiated CNS cell types. RNA seq  
304 analysis of Day 30 organoids sorted for GFP signal strength as a proxy for the level of infection  
305 revealed downregulation of developmental transcription factors DMRTA2, FEZF2, EMX1, and  
306 FOXP1 in all populations regardless of GFP signal strength. These transcription factors are  
307 involved with the development of the telencephalon and regulation of early neuronal cell fate  
308 decision making. FEZF2 is typically expressed in the early cortical progenitor cell population and

309 is critical for fate specification of subcerebral projection neurons through activation of downstream  
310 transcription factor networks (Chen et al. 2008; Wang et al. 2011; Guo et al. 2013). FOXG1 knock-  
311 out mice experience severe microcephaly, a common phenotype of HCMV infection (Martynoga  
312 et al. 2005; Kumamoto and Hanashima 2017). In humans, FOXG1 syndrome, caused by mutations  
313 or deletions in the long (q) arm of chromosome 14, is characterized by impaired development and  
314 structural brain abnormalities (Tohyama et al. 2011; Chiola et al. 2019). DMRTA2 along with  
315 EMX1 are highly expressed in the developing dorsal telencephalon where research in mice reports  
316 reduced cortex size upon mutation (Shinozaki et al. 2004; Konno et al. 2012; Young et al. 2017).  
317 In addition to these roles, several of these transcription factors are involved in key signaling  
318 pathways with wide-ranging impacts. For example, DMRTA2 is cross regulated by the Wnt/ $\beta$ -  
319 catenin signaling pathway, FOXG1 is associated with the SHH pathway, and FEZF2 is an  
320 upstream regulator of cTIP2 and SATB2 regulating fate decisions (Chen et al. 2008; Kuwahara et  
321 al. 2010; Lui et al. 2011). Interestingly, despite no overt indication of active viral replication, the  
322 GFP (-) population exhibit similar transcriptional effects as the GFP (+) and intermediate  
323 populations. This suggests that viral infection has more widespread consequences that likely go  
324 beyond active viral replication. Although further studies are needed to elucidate the mechanisms  
325 underlying the global effect on the transcriptional profile, disruption of cell-cell communication  
326 processes, spread of viral proteins, or distribution of tegument proteins that disrupt cellular  
327 differentiation and function could be potential mechanisms.

328         Several members of the basic helix loop helix (bHLH) transcription factor family,  
329 including HES1, ASCL1, NEUROG1/2, OLIG 2, and N-MYC were also significantly  
330 downregulated across infected organoid groups. This family overlaps with DMRTA2 in protecting  
331 NPC maintenance and has additional roles in controlling the timing behind NPC proliferation and

332 differentiation (Young et al. 2017). Previous research also indicates cross regulation of bHLH  
333 factors by FEZF2 and DMRTA2 (Seo et al. 2007; Yang et al. 2012; Genin et al. 2014; Liu et al.  
334 2017a; Dennis et al. 2019). Further, bHLH factors like HES1 have previously been identified as  
335 downregulated in NPCs following HCMV infection (Liu et al. 2017a; Liu et al. 2017b; Dennis et  
336 al. 2019). N-MYC regulates fating and division of intermediate neural progenitors, has influence  
337 on the expression of other family members through downstream cascades, and is cross regulated  
338 by SHH and Wnt (Kuwahara et al. 2010). The exact mechanism by which HCMV impacts bHLH  
339 factors is not fully elucidated, but studies indicate that HCMV proteins can act directly on genes  
340 to affect transcription or translation, and viral kinases can also function as pseudo kinases to impart  
341 post-translational modifications on host proteins and transcription factors (Mocarski 2007;  
342 Marcinowski et al. 2012; Steingruber and Marschall 2020). Specifically, the viral kinase UL97 can  
343 act as CDK1, which post-translationally modifies many of the bHLH factors altering their  
344 functionality (Gill et al. 2012). The wide-ranging functions within the bHLH family and their  
345 involvement within many common signaling cascades highlights the complexity of the potential  
346 avenues by which HCMV infection can affect neurodevelopmental pathways (Li et al. 2015).

347         It is well established that NPCs exhibit impaired signaling, differentiation, and even  
348 apoptosis following HCMV infection (Luo et al. 2010; Brown et al. 2019; Sison et al. 2019; Sun  
349 et al. 2020) (Figure 7C). NPCs are the cell type most permissive to infection (Luo et al. 2008) and  
350 found abundantly within cultured cerebral organoids. NPCs form early developmental structures  
351 and differentiate into a wide range of cell types in the human brain. Previous work has shown that  
352 IE1 traps unphosphorylated STAT3 in the nucleus and contributes to the reduction in SOX2  
353 expression HCMV infected NPCs (Wu et al. 2018). However, little else is known about how  
354 HCMV downregulates key neurodevelopmental targets. Data from fibroblast cultures indicate the



355 ability of HCMV infection to transcriptionally regulate host genes as well as degrade their protein  
356 products (Cohen and Stern-Ginossar 2014; Khan et al. 2014). Further, overexpression of IE1 or 2  
357 alone in healthy fibroblasts infected with mutated virus unable to transcribe either IE gene  
358 demonstrated rescue in gene targets previously downregulated by infection (Luo 2010, Khan  
359 2013). Therefore, we used a conditional approach to assess the role of IE1/2 on additional  
360 neurodevelopmental gene expression. Initially, infections were conducted at 7 days post plate  
361 down; however, we observed a lack of viral protein replication and low expression of viral proteins  
362 (Figure S2). These results were not entirely unexpected as other groups have reported that NPC  
363 differentiation is inversely correlated to infectability (Odeberg et al. 2006; Gonzalez-Sanchez et  
364 al. 2015). While our experiments using the TB40r mGFP-IE-FKBP virus support this idea, our  
365 data also show that infection at 7 days post plate down still results in transcript level  
366 downregulation despite incomplete viral replication (Figure 4, S2). Although this downregulation  
367 was not as significant or sustained as what was observed in the 72-hour post plate down infection,  
368 these data indicate that viral material and/or partially replicating virus is capable of inducing acute  
369 transcriptional changes in more differentiated NPCs. The neurodevelopmental targets assessed  
370 following infection with the TB40r mGFP-IE-FKBP virus to control IE1/2 expression were clearly  
371 downregulated. However, the results indicate that transcriptional downregulation was largely  
372 independent of IE1/2 expression, which further highlights the ability of other viral components to  
373 impact transcription and translation in infected NPCs.

374 Previous studies from us and others have shown that HCMV infection disrupts calcium and  
375 potassium signaling in infected NPCs and organoids (Brown et al. 2019; Sison et al. 2019; Sun et  
376 al. 2020). We therefore hypothesized that these functional deficits could be due to downregulation  
377 of channel encoding genes responsible for ion transport and maintaining membrane potential.

378 Several such targets showed downregulation within the GFP (+) and intermediate groups (Fig.  
379 3G). CACNA1C and CACNA1G are genes that encode unique voltage gated calcium channel  
380 subtypes. CACNA1G expression gives rise to T-type calcium channels that belong to the low  
381 voltage activated subgroup. Recently, mutations in CACNA1G have been shown to be associated  
382 with early onset cerebellar ataxia and epilepsy (Calhoun et al. 2016; Barresi et al. 2020). The gene  
383 CACNA1C encodes a critical subunit leading to the formation of L-type calcium channels. L-type  
384 channels have a prominent role in controlling gene expression through coupling membrane  
385 depolarization with cAMP response element-binding protein (CREB) phosphorylation via local  
386 Ca<sup>2+</sup>/calmodulin-dependent protein kinase II (CAMKII) signaling; interestingly, both CAMKIIB  
387 and Calmodulin 1/3 (CALM1/3) are downregulated following infection (Zhang et al. 2005; Liang  
388 et al. 2016) thus limiting the ability of CREB to act as the transcriptional regulator of nearly 4,000  
389 downstream gene targets (Wheeler et al. 2012; Chiola et al. 2019). In mice it has been  
390 demonstrated that reduced expression of CACNA1C during development leads to a reduction in  
391 neurogenesis (Lee et al. 2016; Moon et al. 2018). This demonstrates that alterations to the  
392 expression of either CACNA1G or CACNA1C can cause phenotypes similar to those associated  
393 with congenital HCMV infection. CAMKV, while not involved in the activation of CREB, is a  
394 Ca<sup>2+</sup>/calmodulin pseudo kinase that is required for the activity dependent maintenance of dendritic  
395 spines (Saneyoshi et al. 2010; Liang et al. 2016). It is unsurprising then that HCMV infected  
396 organoids and NPCs that display decreased neuronal firing and ability to transport calcium have  
397 CAMKV deficits as many of these processes are cross regulated (Odeberg et al. 2006; Brown et  
398 al. 2019; Sison et al. 2019; Sun et al. 2020). Meanwhile, several potassium channel encoding genes  
399 were downregulated in the GFP (+) and intermediate groups. These genes are important for  
400 potassium ion transport leading to neurotransmitter release and neural excitation. KCNF1, which

401 encodes a member of the voltage-gated potassium channel subfamily F, was particularly  
402 interesting because previous studies had shown it to be downregulated upon HCMV infection in  
403 NPCs (Luo et al. 2010; Young et al. 2011; Brown et al. 2019), and mutations in it and other family  
404 members have been linked to seizures and epilepsy, phenotypes of congenital HCMV infection  
405 (Kohling and Wolfart 2016).

406 Finally, GJA1, which encodes protein connexin-43, was downregulated in both GFP (+)  
407 and intermediate organoid groups compared to mock (Fig. 3,4). In addition to ion channels and  
408 calcium sensors, NPCs rely on gap and tight junctions to communicate with each other through  
409 intercellular ion transport (Wei et al. 2004; Goodenough and Paul 2009; Zhou and Jiang 2014).  
410 This type of communication can inform neural cell fating by cuing NPCs to continue proliferating  
411 or to begin differentiating (Lemcke and Kuznetsov 2013; Zhou and Jiang 2014). There is some  
412 evidence to suggest that HCMV hijacks the existing junctional machinery to spread viral material  
413 (Silva et al. 2005; Cohen and Stern-Ginossar 2014; Khan et al. 2014). In HCMV infected  
414 fibroblasts, there is clear evidence that expression of IE genes specifically leads to decreased  
415 expression of GJA1 and GJC1 (Luo et al. 2008; Khan et al. 2014). Intriguingly, our data suggest  
416 that this is also the case in NPCs (Fig. 6D). As such, we postulate that remodeling of the cell-cell  
417 communication network could be a way by which the virus impacts both signaling and  
418 development in the host and promotes cell-to-cell viral spread early in infection.

419 Despite the differences in viral strain, viral titre, and 2D vs 3D culture models, the shield  
420 (-) NPCs and isolated GFP (-) organoid cells have some interesting similarities. Previous studies  
421 show that the TB40r mGFP-IE-FKBP construct maintains a low level of viral transcript expression  
422 (Pan et al. 2016; Rak et al. 2018); however, our data suggest that this level of expression is likely  
423 not sufficient to cause full replication (Fig. 4, S2). Similarly, IE viral transcripts were still

424 significantly increased in the isolated GFP (-) cells compared to mock conditions despite a lack of  
425 robust GFP expression (Fig. 1D, 4). It is possible that if the GFP (-) cells were given more time in  
426 culture that GFP expression and E-L and L viral transcripts would be more evident. Nevertheless,  
427 significant downregulation of several gene targets was still observed in the absence of robust viral  
428 replication (Fig. 2,3,5,6) suggesting that the presence of some viral transcripts and/or viral material  
429 is sufficient to induce significant gene expression changes in neural tissues.

430 Taken together, we demonstrate that neurodevelopmental gene networks and critical neural  
431 signaling pathways are not dependent on IE1/2 protein expression indicating that other HCMV-  
432 related mechanisms are involved. Therefore, these data suggest that therapeutics designed to solely  
433 limit viral gene and protein expression may be insufficient to impact the widespread neural  
434 differentiation and functional deficits induced by congenital HCMV infection.

435

## 436 **Materials and Methods**

### 437 **Cell culture and viruses**

438 MRC-5 fibroblasts were cultured in Dulbecco's modified Eagle medium (DMEM)  
439 (ThermoFisher Scientific) containing 7% fetal bovine serum (FBS) (Atlanta Biologicals) and 1%  
440 penicillin-streptomycin (ThermoFisher Scientific). Cells were plated at  $1.0 \times 10^4$  cells per well of a  
441 24-well plate onto Matrigel coated coverslips. Matrigel was diluted in DMEM, placed on  
442 coverslips for approximately 12 hr, and aspirated off prior to plating cells. Virus stocks were  
443 prepared by infecting MRC-5 fibroblasts (ATCC) with HCMV strain TB40/E encoding EGFP  
444 (Umashankar et al. 2011). Cell culture medium was collected and pelleted through a sorbitol  
445 cushion (20% sorbitol, 50 mM Tris-HCl, pH 7.2, 1 mM MgCl<sub>2</sub>) at  $55,000 \times g$  for 1 h in a Sorvall  
446 WX-90 ultracentrifuge and SureSpin 630 rotor (ThermoFisher Scientific). The TB40r mGFP-IE-

447 FKBP BAC was kindly provided by E. Borst (unpublished). The virus was cultured in the present  
448 of 1  $\mu$ M Shield-1 (AOBIUS #AOB1848) and replaced every 24 hr. Titers of viral stocks were  
449 determined by a limited dilution assay with the 50% tissue culture infectious dose (TCID<sub>50</sub>) in  
450 MRC-5 cells in a 96-well dish. At 2 weeks post infection, HCMV IE1-positive cells were counted  
451 to determine viral titers, reported as the number of infectious units (IU) per milliliter. IE1-positive  
452 cells were determined using a mouse anti-HCMV IE1 antibody (clone 1B12; generously provided  
453 by Tom Shenk, Princeton University, Princeton, NJ).

454 Two independent iPSC lines were used (4.2 and 21.5/8) (Ebert et al. 2013). The iPSCs  
455 were grown and maintained in Essential 8 Media (ThermoFisher Scientific) and were cultured in  
456 feeder-free conditions on Matrigel (Corning). Neural progenitor cells (NPCs) were differentiated  
457 and maintained as neurospheres (EZ spheres) in Stemline (Millipore Sigma) supplemented with  
458 0.5% N-2 supplement (ThermoFisher Scientific), 100 ng/ml EGF (Miltenyi Biotech), 100 ng/ml  
459 fibroblast growth factor (FGF; Stem Cell Technologies), and 5  $\mu$ g/ml heparin (Millipore Sigma)  
460 as described previously (Ebert et al., 2013). Plated NPCs were grown in Neurobasal medium  
461 (ThermoFisher Scientific) supplemented with 2% B-27 (ThermoFisher Scientific) and 1%  
462 antibiotic-antimycotic (ThermoFisher Scientific). Cells were plated at  $1.0 \times 10^4$  cells per well of a  
463 24-well plate onto Matrigel coated coverslips. Matrigel was diluted in DMEM, placed on  
464 coverslips for approximately 12 hr, and aspirated off prior to plating cells.

465

## 466 **Cerebral Organoids**

467 Cerebral organoid cultures were differentiated from iPSCs according to the specification  
468 of the cerebral organoid kit from StemCell Technologies (#08570) that relies on an established  
469 protocol (Lancaster et al. 2013). These organoids were made from either of the two independent

470 WT stem cell lines (4.2 and 21.5/8), Infected 1 was derived from the 21.5/8 line, Infected 2 and 3  
471 were derived from the 4.2 line, Mock 1 and 2 were derived from the 21.5/8 line, and Mock 3 and  
472 4 were derived from the 4.2 line. (Ebert et al. 2013). Briefly, iPSCs were seeded at  $9 \times 10^3$  cells  
473 per well onto 96-well ultralow attachment plates for embryoid body (EB) formation and grown in  
474 EB formation media (StemCell Technologies). At day 5, the induction of neural epithelium was  
475 initiated by moving the EBs into an ultralow attachment 24-well plate where they were then fed  
476 with induction media (StemCell Technologies). On day 7, neural tissues were embedded in  
477 Matrigel droplets and moved to ultralow attachment 6-well plates and fed expansion media  
478 (Stemcell Technologies). Then at day 10, the plate of developing organoids was transferred to a  
479 rocker which elicits the circulation of nutrients and prevents organoids from sticking to the dish.  
480 From this point on the organoids were fed maturation media (StemCell Technologies) every 3  
481 days. At day 30, organoids were weighed and infected with 200-500 infectious units/ug HCMV  
482 strain TB40/E encoding GFP (Collins-McMillen et al. 2018; Rak et al. 2018; Collins-McMillen et  
483 al. 2019). Media was changed every 3-4 days. At 14 days post infection, organoids were either  
484 fixed for cryosectioning, prepped for FACs sorting, or dissociated in accutase enzyme and lysed  
485 for protein or RNA isolation. Three organoids containing approximately 1-2 million cells each  
486 were combined prior to sorting to ensure sufficient cell numbers in each population for whole  
487 transcriptome analysis.

488

#### 489 **FACs Sorting**

490 Organoids were dissociated using the enzyme accutase at 37°C for x min, and then washed  
491 in PBS. Organoid sorting buffer (1% FBS and 2 mM EDTA in DPBS) was then added to the tube  
492 and gently blown at the organoid until it completely dissociated. This cell suspension was then

493 filtered to remove any remaining cell clumps. Finally, the filtered suspension was placed on ice  
494 until ready for sorting. Fluorescence Activated Cell Sorting (FACs) was performed on BD FACS  
495 Diva 8.0.1. Live cell gating was established using the forward and side scatter plots from an  
496 uninfected organoid. Infected organoids were then further sorted based on GFP fluorescence signal  
497 into GFP (+), GFP intermediate, or GFP (-) that were consistent across replicates. Gating analysis  
498 and plots were generated using Flowjo.

499

### 500 **RNA Sequencing and qRT-PCR**

501 Total RNA was isolated from organoid samples following FACs sorting for live cells and  
502 GFP expression. To insure a high enough RNA concentration, 3 infected organoids were combined  
503 for each N. After isolation RNA was analyzed on the tape station using screen tape from Agilent  
504 (#5067-5576) for quantity and quality. External RNA Controls Consortium (ERCC) spike-in  
505 control from Invitrogen (#4456740) was added to each sample to minimize external sources of  
506 variability. cDNA libraries were then generated for each sample using the NEBNext Poly(A)  
507 mRNA Magnetic Isolation Module (NEB #E7490). Libraries were then analyzed by qPCR  
508 generating CT values using NEBNEXT Library Quant Kit (#E7630) and by tape station with  
509 D1000 screen tape from Agilent (#5067-5582) to calculate fragment base pair size. These  
510 measures were then analyzed by the NEB bio-calculator tool to get an estimated library  
511 concentration. Libraries were then diluted to 4 nM and pooled. Another qPCR was run with the  
512 pooled library to confirm concentration and a new dilution was performed if necessary. The diluted  
513 pooled library (25 pM) was then combined with diluted NEXTSeq PhiX control (#FC-110-3002).  
514 The PhiX control and library were then combined and loaded into the cartridge. Sequencing was

515 performed using the NextSeq 500/550 High Output Kit v2.5 (#20024906) from Illumina.  
516 Preliminary analysis was then performed using the online platform Basepair Technologies.

517 Total RNA was isolated, and reverse transcribed into cDNA using the Promega RT Kit  
518 (#A3500). q-RT-PCR was performed using specific primer sequences as outlined in (Table S5).  
519 The resulting CT values were normalized to GAPDH and the Delta Delta CT method was  
520 employed for analysis.

521

## 522 **Immunofluorescence and Western Blot Analysis**

523 Neural progenitor cells were fixed on coverslips with 4% paraformaldehyde (PFA) for 20  
524 minutes at 4°C, washed with phosphate-buffered saline (PBS), and placed in PBS. For  
525 immunofluorescence, coverslips were blocked with 5% normal donkey serum (S30; Sigma) and  
526 0.1% Triton in PBS for 30 min, incubated in primary antibodies overnight at 4°C, and incubated  
527 in secondary antibodies for 1 h at room temperature. The nuclear stain Hoechst was used to label  
528 nuclei. Primary antibodies used were HES1 (rabbit, PA5-28802; Thermo Fisher), UL123 (mouse;),  
529 and Tuj1 (chicken, GTX85469; GeneTex). Species-appropriate fluorescent secondary antibodies  
530 were used. An upright TS100 Nikon fluorescence microscope and NIS Elements were used for  
531 imaging and analysis.

532 Protein was isolated from NPCs or MRC5 fibroblasts by lifting the cells from the plate  
533 with trypsin (Invitrogen #15400-054) and lysing the cells in nuclear lysis buffer (10 mM NaCl, 50  
534 mM Tris-HCl, pH 7.5, 1 mM EDTA, 1% SDS). Samples were then sonicated to ensure lyses and  
535 quantified using a Pierce BCA assay (ThermoFisher #23225). Equal amounts of protein (20 µg)  
536 were then loaded onto a 10% SDS-PAGE made with 2,2,2-trichloroethanol and run at 130 volts  
537 for 1 hour. Total protein was visualized via stain free detection on the Biorad ChemiDoc MP. Gels



538 were transferred to .45  $\mu$ m Amershan Protran nitrocellulose membranes (Cytiva #10600002) using  
539 a BioRad Trans-Blot Turbo semi dry transfer system. Membranes were probed for IE1 (1:1000,  
540 clone 1B12, Shenk Lab), IE2 (1:1000, clone 3A9, Shenk Lab), UL44(1:10000, Virusys #CA006-  
541 100), and pp28 (1:1000 clone 10B4-29, Shenk Lab), using a goat  $\alpha$  mouse HRP secondary  
542 (Jackson Immunoresearch Laboratories #115-035-003) detected by Novex ECL (Invitrogen  
543 #WP20005).

544

#### 545 **Data analysis**

546 All statistical analysis was performed using Graph Pad Version 9. Data were collected from  
547 3 independent organoid differentiations and infections and analyzed by one-way ANOVA or  
548 Student's T-test as appropriate with Tukey post hoc test for qPCR and western blot.  $p < 0.05$  was  
549 considered significant.

550

#### 551 **Bioinformatics**

552 Fastq files were exported from Illumina sequence hub following sequencing then optical  
553 duplicates were removed and reference genome created using the raw fasta sequences for hg19.  
554 The raw RNA Seq reads are mapped and quantified to combined reference genome using Salmon  
555 v1.4.0. The read count matrix for all transcripts were utilized in R to make PCA plots and to run  
556 differential expression analysis. DESeq2 in R was used to perform the comparisons against mock  
557 samples to get significant up regulated and down regulated genes at adjusted P value  $< 0.05$  and  
558 fold change of 3. Basepair Tech software and expression count analysis of the trimmed reads was  
559 conducted using STAR. Differentially expressed genes were identified by DESeq2 analysis using  
560 cutoffs of adjusted p-value  $< .05$  and  $\log_2$  fold change of  $\pm 3$ . Gene ontology analysis was

561 subsequently performed using G-profiler and DAVID. Additional RNA seq analysis was  
562 performed using ingenuity pathway analysis from Qiagen and Gene Set Enrichment Analysis tool  
563 from UC San Diego and the Broad Institute. For both G-profiler and IPA analysis a list of the  
564 3,000 most differentially expressed genes across samples analyzed were used. All these genes met  
565 the threshold of adj p-value  $< .01$  and log<sub>2</sub> fold change  $\pm 9$  as determined by DESeq2 analysis. For  
566 GSEA analysis the entire list of differentially expressed genes identified by DESeq2 meeting the  
567 adj p-value  $< .05$  and log<sub>2</sub> fold change of  $\pm 3$  cutoffs were used.

568

### 569 **GSEA**

570 Gene set enrichment analysis was performed using GSEA version 3.0 software with default  
571 parameters, classic enrichment, and phenotype permutations at 1000 times. GSEA was performed  
572 on differentially expressed genes determined from DESeq2 analysis of GFP (+) vs Mock and GFP  
573 (-) vs Mock samples using genes that met the cutoff of adj p-value of  $< .05$  and log<sub>2</sub> fold change  
574  $\pm 3$ . The enrichment plots displayed in Figure 3 were generated from analysis of GFP (+) vs Mock  
575 or GFP (-) vs Mock using the software's hallmark gene set

576

### 577 **Acknowledgements**

578 The authors would like to thank Tom Shenk for providing antibodies against HCMV  
579 proteins and Eva Borst for providing the TB40r mGFP-IE-FKBP virus. We thank Benedetta  
580 Bonacci in the Versiti-Blood Research Institute Flow Cytometry Core, and Emma Thomas for the  
581 artwork included in this work. Creation of this art is supported by the VI4-ArtLab Artist-in-  
582 Residence program. Finally, we thank members of the Terhune, Hudson, Rao, and Ebert  
583 laboratories for helpful discussions and input on the project.

584           Research reported in this publication was supported by the National Institute of Allergy  
585 and Infectious Diseases division of the National Institutes of Health under award number  
586 R01AI132414 (S.S.T. and A.D.E.) and R01CA2042031 (S.R.). The content is solely the  
587 responsibility of the authors and does not necessarily represent the official views of the National  
588 Institutes of Health.

589

590           All authors declare no conflicts of interests related to the manuscript. B.S.O, R.L.M, S.S.T.  
591 and A.D.E. were responsible for study design. B.S.O., R.L.M., M.L.S., K.P., S.R. S.S.T., and  
592 A.D.E. conducted experiments, analyzed data, and/or interpreted data. S.R., S.S.T., and A.D.E.  
593 provided resources. B.S.O. R.L.M, and K.P. contributed to writing the manuscript. B.S.O, S.S.T.,  
594 and A.D.E. wrote and edited the final manuscript.

595 **Figure Legends**

596 **Figure 1. Three-dimensional cerebral organoid infection with HCMV.** (A) On Day 30 of  
597 differentiation, organoids were weighed and infected at 500 IU/ug with HCMV-TB40EGFP.  
598 Bright-field and fluorescent images of one representative infected organoid taken at 4, 8, and 12  
599 dpi are shown. (B) Images at 12 dpi of infected and uninfected organoids are displayed, one  
600 representative organoid from each sorted group is shown. (C) Representative GFP intensity plot  
601 from FACs analysis of an infected organoid and percentage of living cells in each organoid group  
602 as determined by FACs each infected organoid group was made up of three pooled organoids. (D)  
603 Percentage of live cells within whole infected and uninfected organoids across samples. (E) qPCR  
604 analysis of viral gene expression within mock compared to GFP (+) and GFP intermediate  
605 subpopulations. (F) qPCR analysis of viral gene expression within mock compared to the GFP (-)  
606 subpopulation.

607

608 **Figure 2. All infected organoid subpopulations cluster distinctly from mock samples with**  
609 **many genes being downregulated.** (A) PCA with components being all mapped genes across  
610 samples split by axis determined by adj p-value and compared between each sample. (B)  
611 Hierarchical cluster analysis of all sequenced samples for the top 500 most variable genes  
612 according to read counts assigned. Hierarchical cluster analysis of only infected samples for the  
613 top 500 most variable genes according to read counts assigned. (C) Volcano plot of the top 2,500  
614 differentially expressed genes comparing GFP (-) vs. Mock as determined by adj p-value < .01.  
615 Volcano plot of the top 2,500 differentially expressed genes comparing GFP (+) vs Mock as  
616 determined by adj p-value. Arrows denote representative genes downregulated in both groups. (D)

617 Venn diagram comparing the 2,500 most differentially expressed genes in GFP (-) vs. Mock and  
618 GFP (+) vs. Mock.

619

620 **Figure 3. Gene set enrichment analysis (GSEA) plots comparing infected organoid**  
621 **populations to mock.** GSEA using the hallmark gene set on a list of all differentially expressed  
622 genes with fold change  $\pm 3$  and adj p-value  $< .05$ . (A) Hallmark interferon alpha response  
623 enrichment plots and corresponding heat maps from GFP (+) vs Mock and GFP (-) vs Mock  
624 respectively. (B) Additional enrichment plots and heat maps (40 representative genes each) from  
625 GSEA comparing GFP (+) vs Mock revealing significant de-enrichment in GFP (+) groups. A  
626 normalized enrichment score (NES) and normalized p-value (NOM p-value) for each plot are  
627 shown below, a cutoff of NOM p-value  $< .05$  was used to establish significance.

628

629 **Figure 4. Pathway and ontology analysis conducted on GFP (+) vs Mock and heat maps**  
630 **displaying up and downregulated genes.** (A) Gene Ontology analysis of the top 3,000  
631 differentially expressed genes when comparing GFP (+) vs. Mock using fold change  $\pm 3$  and adj  
632 p-value  $< .01$ . Terms listed were the five most significant across categories molecular function,  
633 biological process, and cellular components. (B) Heat maps showing 20 representative genes  
634 within the ontology classifications from (A), the values in the heat map are the average raw read  
635 count number across GFP (+) or Mock samples. (C) Most significantly impacted canonical  
636 pathways as determined by ingenuity pathway analysis using the same gene list as in (A). (D)  
637 Node diagram generated from IPA core analysis using the same gene list as in (A) organized based  
638 on most significantly affected canonical pathway regulators, how they interconnect and effect  
639 downstream functions (Solid lines indicate direct interaction and dashed lines indicate indirect

640 interaction). (E) Heat maps containing 20 of the most significantly upregulated genes in GFP (+)  
641 and GFP (-) groups vs Mock determined by adj p-value and fold change. For ontology and IPA  
642 significance is displayed as  $-\log(\text{adj p-value})$  (Bolded genes within the heat maps identify those  
643 used in subsequent shield-1 experiments).

644

645 **Figure 5. Infection of NPCs with TB40r mGFP-IE-FKBP virus results in limited expression**  
646 **of viral proteins UL122/UL123 unless shield-1 is administered.** NPCs were infected at 3- or 7-  
647 days post plate down with **TB40r mGFP-IE-FKBP** at an MOI of 1. One group was then  
648 supplemented with 1 uM shield-1 daily (shield +) while the other was given vehicle (shield -). (A)  
649 Immunofluorescent images at 24, 48, and 72 hpi from NPCs infected 3 days post plate down with  
650 HCMV-IE1/IE2-ddFKBP and probed for HCMV IE gene IE1 (green), neuronal specific beta-  
651 tubulin Tuj1 (purple), neurodevelopmental transcription factor Hes1 (red), Hoescht (blue), and  
652 merge (All images taken at 20X, Using Nikon TL-1). (B-C) Expression of HCMV viral genes  
653 (UL122 (IE), UL123 (IE), UL44 (E), and UL99 (L)) within NPCs infected 3- or 7- days post plate  
654 down at 24, 48, and 72 hours post infection (hpi) as determined by qPCR. Stars were assigned  
655 based on level of significance as determined by T-test: \* =  $p \leq .05$ , \*\* =  $p \leq .01$ , \*\*\* =  $p \leq .001$ ,  
656 and \*\*\*\* =  $p \leq .00001$ .

657

658 **Figure 6. Neurodevelopmental gene targets are downregulated within NPCs infected with**  
659 **TB40r mGFP-IE-FKBP independent of shield-1 administration.** (A-B) qPCRs were performed  
660 for several key neurodevelopmental transcription factors (FezF2, FOYG1, DMRTA2, and EMX1)  
661 within the HCMV-IE1/IE2-ddFKBP infected (shield +) and (shield -) groups plus uninfected  
662 (mock) NPCs at both 3- and 7- days post plate down infected NPCs. No effect of shield

663 administration was observed for these targets. Stars were assigned based on level of significance  
664 as determined by ANOVA: \* =  $p \leq .05$ , \*\* =  $p \leq .01$ , \*\*\* =  $p \leq .001$ , and \*\*\*\* =  $p \leq .00001$ .

665

666 **Figure 7. Signaling and cell-cell communication gene targets are downregulated within NPCs**

667 **infected with TB40r mGFP-IE-FKBP depending on shield-1 administration.** Following the

668 same parameters as Figure 6, qPCRs were conducted for expression of signaling, cell-cell

669 communication, and junctional genes (CACNA1C, CACNA1G, CAMKV, KCNF1, and GJA1).

670 (A) For these targets shield administration had no impact on gene expression levels. (B,C) A shield

671 dependent effect was observed when comparing shield (-) and shield (+) infected groups for these

672 targets. Stars were assigned based on level of significance as determined by ANOVA: \* =  $p \leq .05$ ,

673 \*\* =  $p \leq .01$ , \*\*\* =  $p \leq .001$ , and \*\*\*\* =  $p \leq .00001$ . (D) Graphical summary integrating current

674 literature with this study's findings regarding HCMVs impact on development within NPCs and

675 cerebral organoids.

676

677 **Supplementary**

678 **Figure S1. Representative FACS traces from an HCMV-TB40EGFP infected organoid.** (A)

679 Set of three scatter analysis plots used to determine the live cell population within the organoid,

680 live cell gates were set based on the uninfected condition. (B) Table breaking down relative cell

681 counts within each gated population. (C) Plot of GFP signal intensity against total number of sorted

682 cells, GFP gates were set based on previous infected organoid sorting. (D) Relative number of

683 cells within each infected subpopulation, broken down by replicate.

684

685 **Figure S2. Representative FACs traces from an uninfected organoid.** (A) Set of three scatter  
686 analysis plots used to determine the live cell population within the organoid, live cell gates were  
687 set based on the uninfected condition. (B-C) Side scatter versus GFP plot in an uninfected organoid  
688 showing lack of GFP signal. (D) Percentage of live cells across all organoids sorted for sequencing.  
689

690 **Figure S3. Additional gene ontology analysis for GFP (+) vs. Mock and GFP (-) vs. Mock.**  
691 (A) Ontology conducted using the same 3,000 gene list as in Figure 3A with the platform DAVID  
692 instead of G-profiler. Results shown are the top 20 most significant terms.  
693

694 **Figure S4. Network diagrams generated from IPA, summarize three key affected canonical**  
695 **pathways that were differentially affected by infection.** (A) Synaptogenesis signaling pathway-  
696  $\log(\text{adj p-value}) = 16.367$  majority of pathway components were downregulated. (B) mTOR  
697 signaling  $-\log(\text{adj p-value}) = 17.479$  majority of pathway components were downregulated. (C)  
698 RHOGDI signaling  $-\log(\text{adj p-value}) = 11.123$  mixture of upregulated and downregulated pathway  
699 components.  
700

701 **Figure S5. Ingenuity pathway core analysis diagram for GFP (+) vs. Mock.** (A) Node diagram  
702 generated using IPA to connect major affected pathways and functional outcomes within the GFP  
703 (+) samples to regulators, done using the same gene list as IPA from Figure 3.



## 704 References

- 705 Adamson CS, Nevels MM. 2020. Bright and Early: Inhibiting Human Cytomegalovirus by  
706 Targeting Major Immediate-Early Gene Expression or Protein Function. *Viruses-Basel* **12**.  
707 Altman AM, Mahmud J, Nikolovska-Coleska Z, Chan G. 2019. HCMV modulation of cellular  
708 PI3K/AKT/mTOR signaling: New opportunities for therapeutic intervention? *Antivir Res*  
709 **163**: 82-90.
- 710 Barresi S, Dentici ML, Manzoni F, Bellacchio E, Agolini E, Pizzi S, Ciolfi A, Tarnopolsky M,  
711 Brady L, Garone G et al. 2020. Infantile-Onset Syndromic Cerebellar Ataxia and  
712 CACNA1G Mutations. *Pediatr Neurol* **104**: 40-45.
- 713 Boyle KA, Pietropaolo RL, Compton T. 1999. Engagement of the cellular receptor for  
714 glycoprotein B of human cytomegalovirus activates the interferon-responsive pathway.  
715 *Mol Cell Biol* **19**: 3607-3613.
- 716 Britt WJ, Prichard MN. 2018. New therapies for human cytomegalovirus infections. *Antiviral Res*  
717 **159**: 153-174.
- 718 Brown RM, Rana P, Jaeger HK, O'Dowd JM, Balemba OB, Fortunato EA. 2019. Human  
719 Cytomegalovirus Compromises Development of Cerebral Organoids. *J Virol* **93**.
- 720 Calhoun JD, Hawkins NA, Zachwieja NJ, Kearney JA. 2016. Cacna1g is a genetic modifier of  
721 epilepsy caused by mutation of voltage-gated sodium channel Scn2a. *Epilepsia* **57**: E103-  
722 E107.
- 723 Chambers J, Angulo A, Amaratunga D, Guo H, Jiang Y, Wan JS, Bittner A, Frueh K, Jackson  
724 MR, Peterson PA et al. 1999. DNA microarrays of the complex human cytomegalovirus  
725 genome: profiling kinetic class with drug sensitivity of viral gene expression. *J Virol* **73**:  
726 5757-5766.
- 727 Chen B, Wang SS, Hattox AM, Rayburn H, Nelson SB, McConnell SK. 2008. The Fezf2-Ctip2  
728 genetic pathway regulates the fate choice of subcortical projection neurons in the  
729 developing cerebral cortex. *P Natl Acad Sci USA* **105**: 11382-11387.
- 730 Chiola S, Do MD, Centrone L, Mallamaci A. 2019. Foxg1 Overexpression in Neocortical  
731 Pyramids Stimulates Dendrite Elongation Via Hes1 and pCreb1 Upregulation. *Cerebral*  
732 *Cortex* **29**: 1006-1019.
- 733 Cohen Y, Stern-Ginossar N. 2014. Manipulation of host pathways by human cytomegalovirus:  
734 insights from genome-wide studies. *Semin Immunopathol* **36**: 651-658.
- 735 Collins-McMillen D, Buehler J, Peppenelli M, Goodrum F. 2018. Molecular Determinants and the  
736 Regulation of Human Cytomegalovirus Latency and Reactivation. *Viruses* **10**.
- 737 Collins-McMillen D, Rak M, Buehler JC, Igarashi-Hayes S, Kamil JP, Moorman NJ, Goodrum F.  
738 2019. Alternative promoters drive human cytomegalovirus reactivation from latency. *Proc*  
739 *Natl Acad Sci U S A* **116**: 17492-17497.
- 740 D'Aiuto L, Di Maio R, Heath B, Raimondi G, Milosevic J, Watson AM, Bamne M, Parks WT,  
741 Yang L, Lin B et al. 2012. Human induced pluripotent stem cell-derived models to  
742 investigate human cytomegalovirus infection in neural cells. *PLoS One* **7**: e49700.
- 743 Dennis DJ, Han S, Schuurmans C. 2019. bHLH transcription factors in neural development,  
744 disease, and reprogramming. *Brain Res* **1705**: 48-65.
- 745 Ebert AD, Shelley BC, Hurley AM, Onorati M, Castiglioni V, Patitucci TN, Svendsen SP, Mattis  
746 VB, McGivern JV, Schwab AJ et al. 2013. EZ spheres: a stable and expandable culture  
747 system for the generation of pre-rosette multipotent stem cells from human ESCs and  
748 iPSCs. *Stem Cell Res* **10**: 417-427.

- 749 Genin EC, Caron N, Vandenbosch R, Nguyen L, Malgrange B. 2014. Concise Review: Forkhead  
750 Pathway in the Control of Adult Neurogenesis. *Stem Cells* **32**: 1398-1407.
- 751 Gill RB, James SH, Prichard MN. 2012. Human cytomegalovirus UL97 kinase alters the  
752 accumulation of CDK1. *J Gen Virol* **93**: 1743-1755.
- 753 Glass M, Busche A, Wagner K, Messerle M, Borst EM. 2009. Conditional and reversible  
754 disruption of essential herpesvirus proteins. *Nat Methods* **6**: 577-579.
- 755 Gonzalez-Sanchez HM, Monsivais-Urenda A, Salazar-Aldrete CA, Hernandez-Salinas A, Noyola  
756 DE, Jimenez-Capdeville ME, Martinez-Serrano A, Castillo CG. 2015. Effects of  
757 cytomegalovirus infection in human neural precursor cells depend on their differentiation  
758 state. *J Neurovirol* **21**: 346-357.
- 759 Goodenough DA, Paul DL. 2009. Gap junctions. *Cold Spring Harb Perspect Biol* **1**: a002576.
- 760 Griffiths P, Baraniak I, Reeves M. 2015. The pathogenesis of human cytomegalovirus. *J Pathol*  
761 **235**: 288-297.
- 762 Guo C, Eckler MJ, McKenna WL, McKinsey GL, Rubenstein JLR, Chen B. 2013. Fezf2  
763 Expression Identifies a Multipotent Progenitor for Neocortical Projection Neurons,  
764 Astrocytes, and Oligodendrocytes. *Neuron* **80**: 1167-1174.
- 765 Hindley C, Ali F, McDowell G, Cheng K, Jones A, Guillemot F, Philpott A. 2012. Post-  
766 translational modification of Ngn2 differentially affects transcription of distinct targets to  
767 regulate the balance between progenitor maintenance and differentiation. *Development*  
768 **139**: 1718-1723.
- 769 Jault FM, Jault JM, Ruchti F, Fortunato EA, Clark C, Corbeil J, Richman DD, Spector DH. 1995.  
770 Cytomegalovirus infection induces high levels of cyclins, phosphorylated Rb, and p53,  
771 leading to cell cycle arrest. *J Virol* **69**: 6697-6704.
- 772 Khan Z, Yaiw KC, Wilhelmi V, Lam H, Rahbar A, Stragliotto G, Soderberg-Naucler C. 2014.  
773 Human cytomegalovirus immediate early proteins promote degradation of connexin 43 and  
774 disrupt gap junction communication: implications for a role in gliomagenesis.  
775 *Carcinogenesis* **35**: 145-154.
- 776 Kohling R, Wolfart J. 2016. Potassium Channels in Epilepsy. *Cold Spring Harb Perspect Med* **6**.
- 777 Konno D, Iwashita M, Satoh Y, Momiyama A, Abe T, Kiyonari H, Matsuzaki F. 2012. The  
778 Mammalian DM Domain Transcription Factor Dmrta2 Is Required for Early Embryonic  
779 Development of the Cerebral Cortex. *Plos One* **7**.
- 780 Kudchodkar SB, Yu Y, Maguire TG, Alwine JC. 2006. Human cytomegalovirus infection alters  
781 the substrate specificities and rapamycin sensitivities of raptor- and rictor-containing  
782 complexes. *Proc Natl Acad Sci U S A* **103**: 14182-14187.
- 783 Kumamoto T, Hanashima C. 2017. Evolutionary conservation and conversion of Foxg1 function  
784 in brain development. *Dev Growth Differ* **59**: 258-269.
- 785 Kuwahara A, Hirabayashi Y, Knoepfler PS, Taketo MM, Sakai J, Kodama T, Gotoh Y. 2010. Wnt  
786 signaling and its downstream target N-myc regulate basal progenitors in the developing  
787 neocortex. *Development* **137**: 1035-1044.
- 788 Lancaster MA, Renner M, Martin CA, Wenzel D, Bicknell LS, Hurler ME, Homfray T, Penninger  
789 JM, Jackson AP, Knoblich JA. 2013. Cerebral organoids model human brain development  
790 and microcephaly. *Nature* **501**: 373-379.
- 791 Lee AS, De Jesus-Cortes H, Kabir ZD, Knobbe W, Orr M, Burgdorf C, Huntington P, McDaniel  
792 L, Britt JK, Hoffmann F et al. 2016. The Neuropsychiatric Disease-Associated Gene  
793 *cacna1c* Mediates Survival of Young Hippocampal Neurons. *Eneuro* **3**.

- 794 Lemcke H, Kuznetsov SA. 2013. Involvement of connexin43 in the EGF/EGFR signalling during  
795 self-renewal and differentiation of neural progenitor cells. *Cell Signal* **25**: 2676-2684.
- 796 Li XJ, Liu XJ, Yang B, Fu YR, Zhao F, Shen ZZ, Miao LF, Rayner S, Chavanas S, Zhu H et al.  
797 2015. Human Cytomegalovirus Infection Dysregulates the Localization and Stability of  
798 NICD1 and Jag1 in Neural Progenitor Cells. *J Virol* **89**: 6792-6804.
- 799 Liang ZY, Zhan Y, Shen Y, Wong CCL, Yates JR, Plattner F, Lai KO, Ip NY. 2016. The  
800 pseudokinase CaMKv is required for the activity-dependent maintenance of dendritic  
801 spines. *Nat Commun* **7**.
- 802 Liu XJ, Jiang X, Huang SN, Sun JY, Zhao F, Zeng WB, Luo MH. 2017a. Human cytomegalovirus  
803 infection dysregulates neural progenitor cell fate by disrupting Hes1 rhythm and down-  
804 regulating its expression. *Virol Sin* **32**: 188-198.
- 805 Liu XJ, Yang B, Huang SN, Wu CC, Li XJ, Cheng S, Jiang X, Hu F, Ming YZ, Nevels M et al.  
806 2017b. Human cytomegalovirus IE1 downregulates Hes1 in neural progenitor cells as a  
807 potential E3 ubiquitin ligase. *Plos Pathog* **13**.
- 808 Lui JH, Hansen DV, Kriegstein AR. 2011. Development and evolution of the human neocortex.  
809 *Cell* **146**: 18-36.
- 810 Luo MH, Hannemann H, Kulkarni AS, Schwartz PH, O'Dowd JM, Fortunato EA. 2010. Human  
811 Cytomegalovirus Infection Causes Premature and Abnormal Differentiation of Human  
812 Neural Progenitor Cells. *Journal of Virology* **84**: 3528-3541.
- 813 Luo MH, Schwartz PH, Fortunato EA. 2008. Neonatal Neural Progenitor Cells and Their Neuronal  
814 and Glial Cell Derivatives Are Fully Permissive for Human Cytomegalovirus Infection.  
815 *Journal of Virology* **82**: 9994-10007.
- 816 Marcinowski L, Lidschreiber M, Windhager L, Rieder M, Bosse JB, Radle B, Bonfert T, Gyory I,  
817 de Graaf M, da Costa OP et al. 2012. Real-time Transcriptional Profiling of Cellular and  
818 Viral Gene Expression during Lytic Cytomegalovirus Infection. *Plos Pathog* **8**.
- 819 Martynoga B, Morrison H, Price DJ, Mason JO. 2005. Foxg1 is required for specification of ventral  
820 telencephalon and region-specific regulation of dorsal telencephalic precursor proliferation  
821 and apoptosis. *Dev Biol* **283**: 113-127.
- 822 Michelson S, Alcamì J, Kim SJ, Danielpour D, Bachelier F, Picard L, Bessia C, Paya C, Virelizier  
823 JL. 1994. Human cytomegalovirus infection induces transcription and secretion of  
824 transforming growth factor beta 1. *J Virol* **68**: 5730-5737.
- 825 Mocarski ES. 2007. Betaherpes viral genes and their functions. *Human Herpesviruses: Biology,*  
826 *Therapy, and Immunoprophylaxis*: 204-230.
- 827 Mocarski ES, Jr., Kemble GW. 1996. Recombinant cytomegaloviruses for study of replication and  
828 pathogenesis. *Intervirology* **39**: 320-330.
- 829 Moon AL, Haan N, Wilkinson LS, Thomas KL, Hall J. 2018. CACNA1C: Association With  
830 Psychiatric Disorders, Behavior, and Neurogenesis. *Schizophrenia Bull* **44**: 958-965.
- 831 Moorman NJ, Cristea IM, Terhune SS, Rout MP, Chait BT, Shenk T. 2008. Human  
832 cytomegalovirus protein UL38 inhibits host cell stress responses by antagonizing the  
833 tuberous sclerosis protein complex. *Cell Host Microbe* **3**: 253-262.
- 834 Odeberg J, Wolmer N, Falci S, Westgren M, Seiger A, Soderberg-Naucler C. 2006. Human  
835 cytomegalovirus inhibits neuronal differentiation and induces apoptosis in human neural  
836 precursor cells. *J Virol* **80**: 8929-8939.
- 837 Pan D, Xuan BQ, Sun YM, Huang SW, Xie MR, Bai YD, Xu WJ, Qian ZK. 2016. An intein-  
838 mediated modulation of protein stability system and its application to study human  
839 cytomegalovirus essential gene function. *Sci Rep-Uk* **6**.

- 840 Pan X, Li XJ, Liu XJ, Yuan H, Li JF, Duan YL, Ye HQ, Fu YR, Qiao GH, Wu CC et al. 2013.  
841 Later Passages of Neural Progenitor Cells from Neonatal Brain Are More Permissive for  
842 Human Cytomegalovirus Infection. *Journal of Virology* **87**: 10968-10979.
- 843 Pass RF, Arav-Boger R. 2018. Maternal and fetal cytomegalovirus infection: diagnosis,  
844 management, and prevention. *F1000Res* **7**: 255.
- 845 Paulus C, Krauss S, Nevels M. 2006. A human cytomegalovirus antagonist of type I IFN-  
846 dependent signal transducer and activator of transcription signaling. *Proc Natl Acad Sci U*  
847 *S A* **103**: 3840-3845.
- 848 Perng YC, Qian ZK, Fehr AR, Xuan BQ, Yu D. 2011. The Human Cytomegalovirus Gene UL79  
849 Is Required for the Accumulation of Late Viral Transcripts. *Journal of Virology* **85**: 4841-  
850 4852.
- 851 Pignoloni B, Fionda C, Dell'Oste V, Luganini A, Cippitelli M, Zingoni A, Landolfo S, Gribaudo  
852 G, Santoni A, Cerboni C. 2016. Distinct Roles for Human Cytomegalovirus Immediate  
853 Early Proteins IE1 and IE2 in the Transcriptional Regulation of MICA and PVR/CD155  
854 Expression. *J Immunol* **197**: 4066-4078.
- 855 Rak MA, Buehler J, Zeltzer S, Reitsma J, Molina B, Terhune S, Goodrum F. 2018. Human  
856 Cytomegalovirus UL135 Interacts with Host Adaptor Proteins To Regulate Epidermal  
857 Growth Factor Receptor and Reactivation from Latency. *J Virol* **92**.
- 858 Reitsma JM, Sato H, Nevels M, Terhune SS, Paulus C. 2013. Human cytomegalovirus IE1 protein  
859 disrupts interleukin-6 signaling by sequestering STAT3 in the nucleus. *J Virol* **87**: 10763-  
860 10776.
- 861 Saneyoshi T, Fortin DA, Soderling TR. 2010. Regulation of spine and synapse formation by  
862 activity-dependent intracellular signaling pathways. *Curr Opin Neurobiol* **20**: 108-115.
- 863 Seo S, Lim JW, Yellajoshiyula D, Chang LW, Kroll KL. 2007. Neurogenin and NeuroD direct  
864 transcriptional targets and their regulatory enhancers. *Embo J* **26**: 5093-5108.
- 865 Shinozaki K, Yoshida M, Nakamura M, Aizawa S, Suda Y. 2004. Emx1 and Emx2 cooperate in  
866 initial phase of archipallium development. *Mech Dev* **121**: 475-489.
- 867 Silva MC, Schroer J, Shenk T. 2005. Human cytomegalovirus cell-to-cell spread in the absence of  
868 an essential assembly protein. *P Natl Acad Sci USA* **102**: 2081-2086.
- 869 Sinzger C, Digel M, Jahn G. 2008. Cytomegalovirus cell tropism. *Curr Top Microbiol Immunol*  
870 **325**: 63-83.
- 871 Sison SL, O'Brien BS, Johnson AJ, Seminary ER, Terhune SS, Ebert AD. 2019. Human  
872 Cytomegalovirus Disruption of Calcium Signaling in Neural Progenitor Cells and  
873 Organoids. *J Virol* **93**.
- 874 Steingruber M, Marschall M. 2020. The Cytomegalovirus Protein Kinase pUL97: Host  
875 Interactions, Regulatory Mechanisms and Antiviral Drug Targeting. *Microorganisms* **8**.
- 876 Sun GQ, Chiuppesi F, Chen XW, Wang C, Tian E, Nguyen J, Kha M, Trinh D, Zhang HN,  
877 Marchetto MC et al. 2020. Modeling Human Cytomegalovirus-Induced Microcephaly in  
878 Human iPSC-Derived Brain Organoids. *Cell Rep Med* **1**.
- 879 Tirosh O, Cohen Y, Shitrit A, Shani O, Le-Trilling VTK, Trilling M, Friedlander G, Tanenbaum  
880 M, Stern-Ginossar N. 2015. The Transcription and Translation Landscapes during Human  
881 Cytomegalovirus Infection Reveal Novel Host-Pathogen Interactions. *Plos Pathog* **11**.
- 882 Tohyama J, Yamamoto T, Hosoki K, Nagasaki K, Akasaka N, Ohashi T, Kobayashi Y, Saitoh S.  
883 2011. West Syndrome Associated With Mosaic Duplication of FOXP1 in a Patient With  
884 Maternal Uniparental Disomy of Chromosome 14. *Am J Med Genet A* **155a**: 2584-2588.

- 885 Umashankar M, Petrucelli A, Cicchini L, Caposio P, Kreklywich CN, Rak M, Bughio F, Goldman  
886 DC, Hamlin KL, Nelson JA et al. 2011. A novel human cytomegalovirus locus modulates  
887 cell type-specific outcomes of infection. *Plos Pathog* **7**: e1002444.
- 888 Wang ZB, Boisvert E, Zhang X, Guo M, Fashoyin A, Du ZW, Zhang SC, Li XJ. 2011. Fezf2  
889 regulates telencephalic precursor differentiation from mouse embryonic stem cells. *Cereb*  
890 *Cortex* **21**: 2177-2186.
- 891 Wei CJ, Xu X, Lo CW. 2004. Connexins and cell signaling in development and disease. *Annu Rev*  
892 *Cell Dev Biol* **20**: 811-838.
- 893 Wheeler DG, Groth RD, Ma H, Barrett CF, Owen SF, Safa P, Tsien RW. 2012. Ca(v)1 and Ca(v)2  
894 Channels Engage Distinct Modes of Ca<sup>2+</sup> Signaling to Control CREB-Dependent Gene  
895 Expression. *Cell* **149**: 1112-1124.
- 896 Wu CC, Jiang X, Wang XZ, Liu XJ, Li XJ, Yang B, Ye HQ, Harwardt T, Jiang M, Xia HM et al.  
897 2018. Human Cytomegalovirus Immediate Early 1 Protein Causes Loss of SOX2 from  
898 Neural Progenitor Cells by Trapping Unphosphorylated STAT3 in the Nucleus. *J Virol* **92**.
- 899 Xu H, Jiao Y, Qin S, Zhao W, Chu Q, Wu K. 2018. Organoid technology in disease modelling,  
900 drug development, personalized treatment and regeneration medicine. *Exp Hematol Oncol*  
901 **7**: 30.
- 902 Yang N, Dong ZQ, Guo S. 2012. Fezf2 Regulates Multilineage Neuronal Differentiation through  
903 Activating Basic Helix-Loop-Helix and Homeodomain Genes in the Zebrafish Ventral  
904 Forebrain. *J Neurosci* **32**: 10940-10948.
- 905 Young A, Machacek DW, Dhara SK, Macleish PR, Benveniste M, Dodla MC, Sturkie CD, Stice  
906 SL. 2011. Ion channels and ionotropic receptors in human embryonic stem cell derived  
907 neural progenitors. *Neuroscience* **192**: 793-805.
- 908 Young FI, Keruzore M, Nan XS, Gennet N, Bellefroid EJ, Li M. 2017. The doublesex-related  
909 Dmrt2 safeguards neural progenitor maintenance involving transcriptional regulation of  
910 Hes1. *P Natl Acad Sci USA* **114**: E5599-E5607.
- 911 Zhang XM, Odom DT, Koo SH, Conkright MD, Canettieri G, Best J, Chen HM, Jenner R,  
912 Herbolsheimer E, Jacobsen E et al. 2005. Genome-wide analysis of cAMP-response  
913 element binding protein occupancy, phosphorylation, and target gene activation in human  
914 tissues. *P Natl Acad Sci USA* **102**: 4459-4464.
- 915 Zhou JZ, Jiang JX. 2014. Gap junction and hemichannel-independent actions of connexins on cell  
916 and tissue functions--an update. *FEBS Lett* **588**: 1186-1192.
- 917

Figure 1

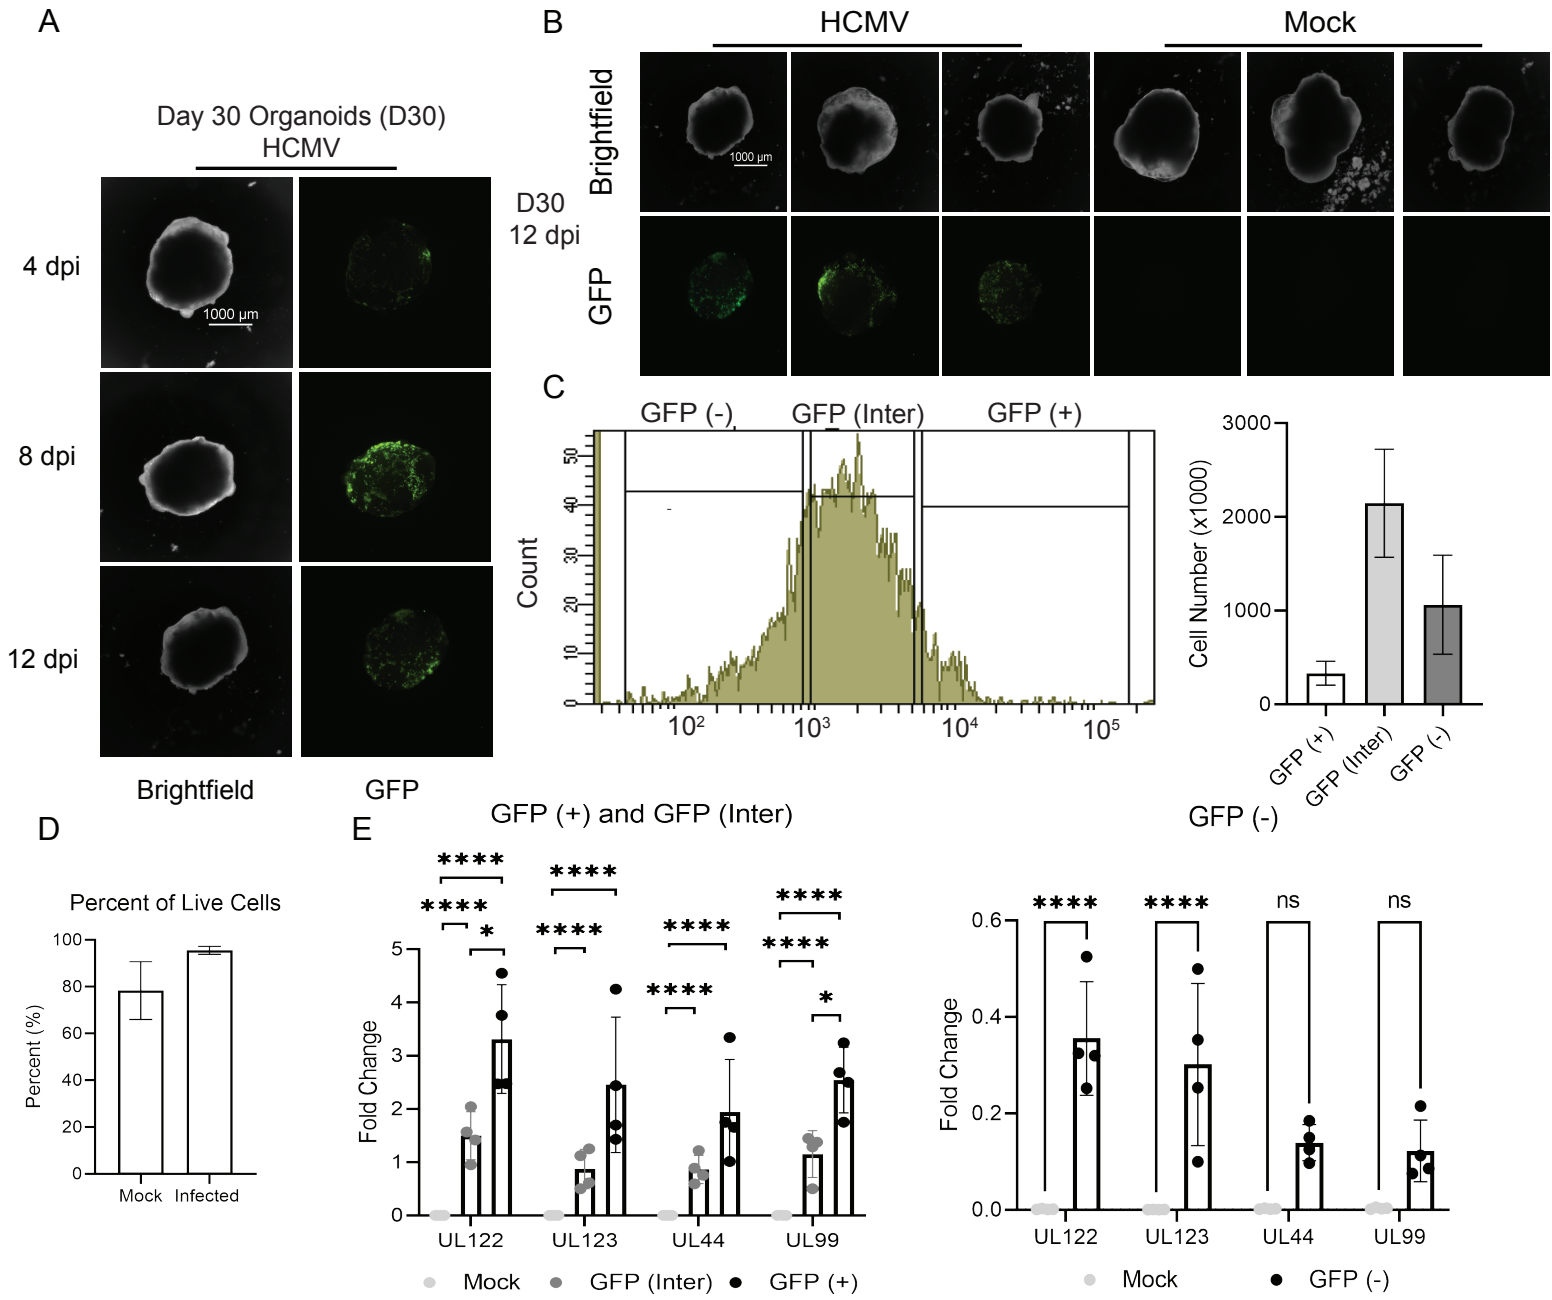

Figure 2

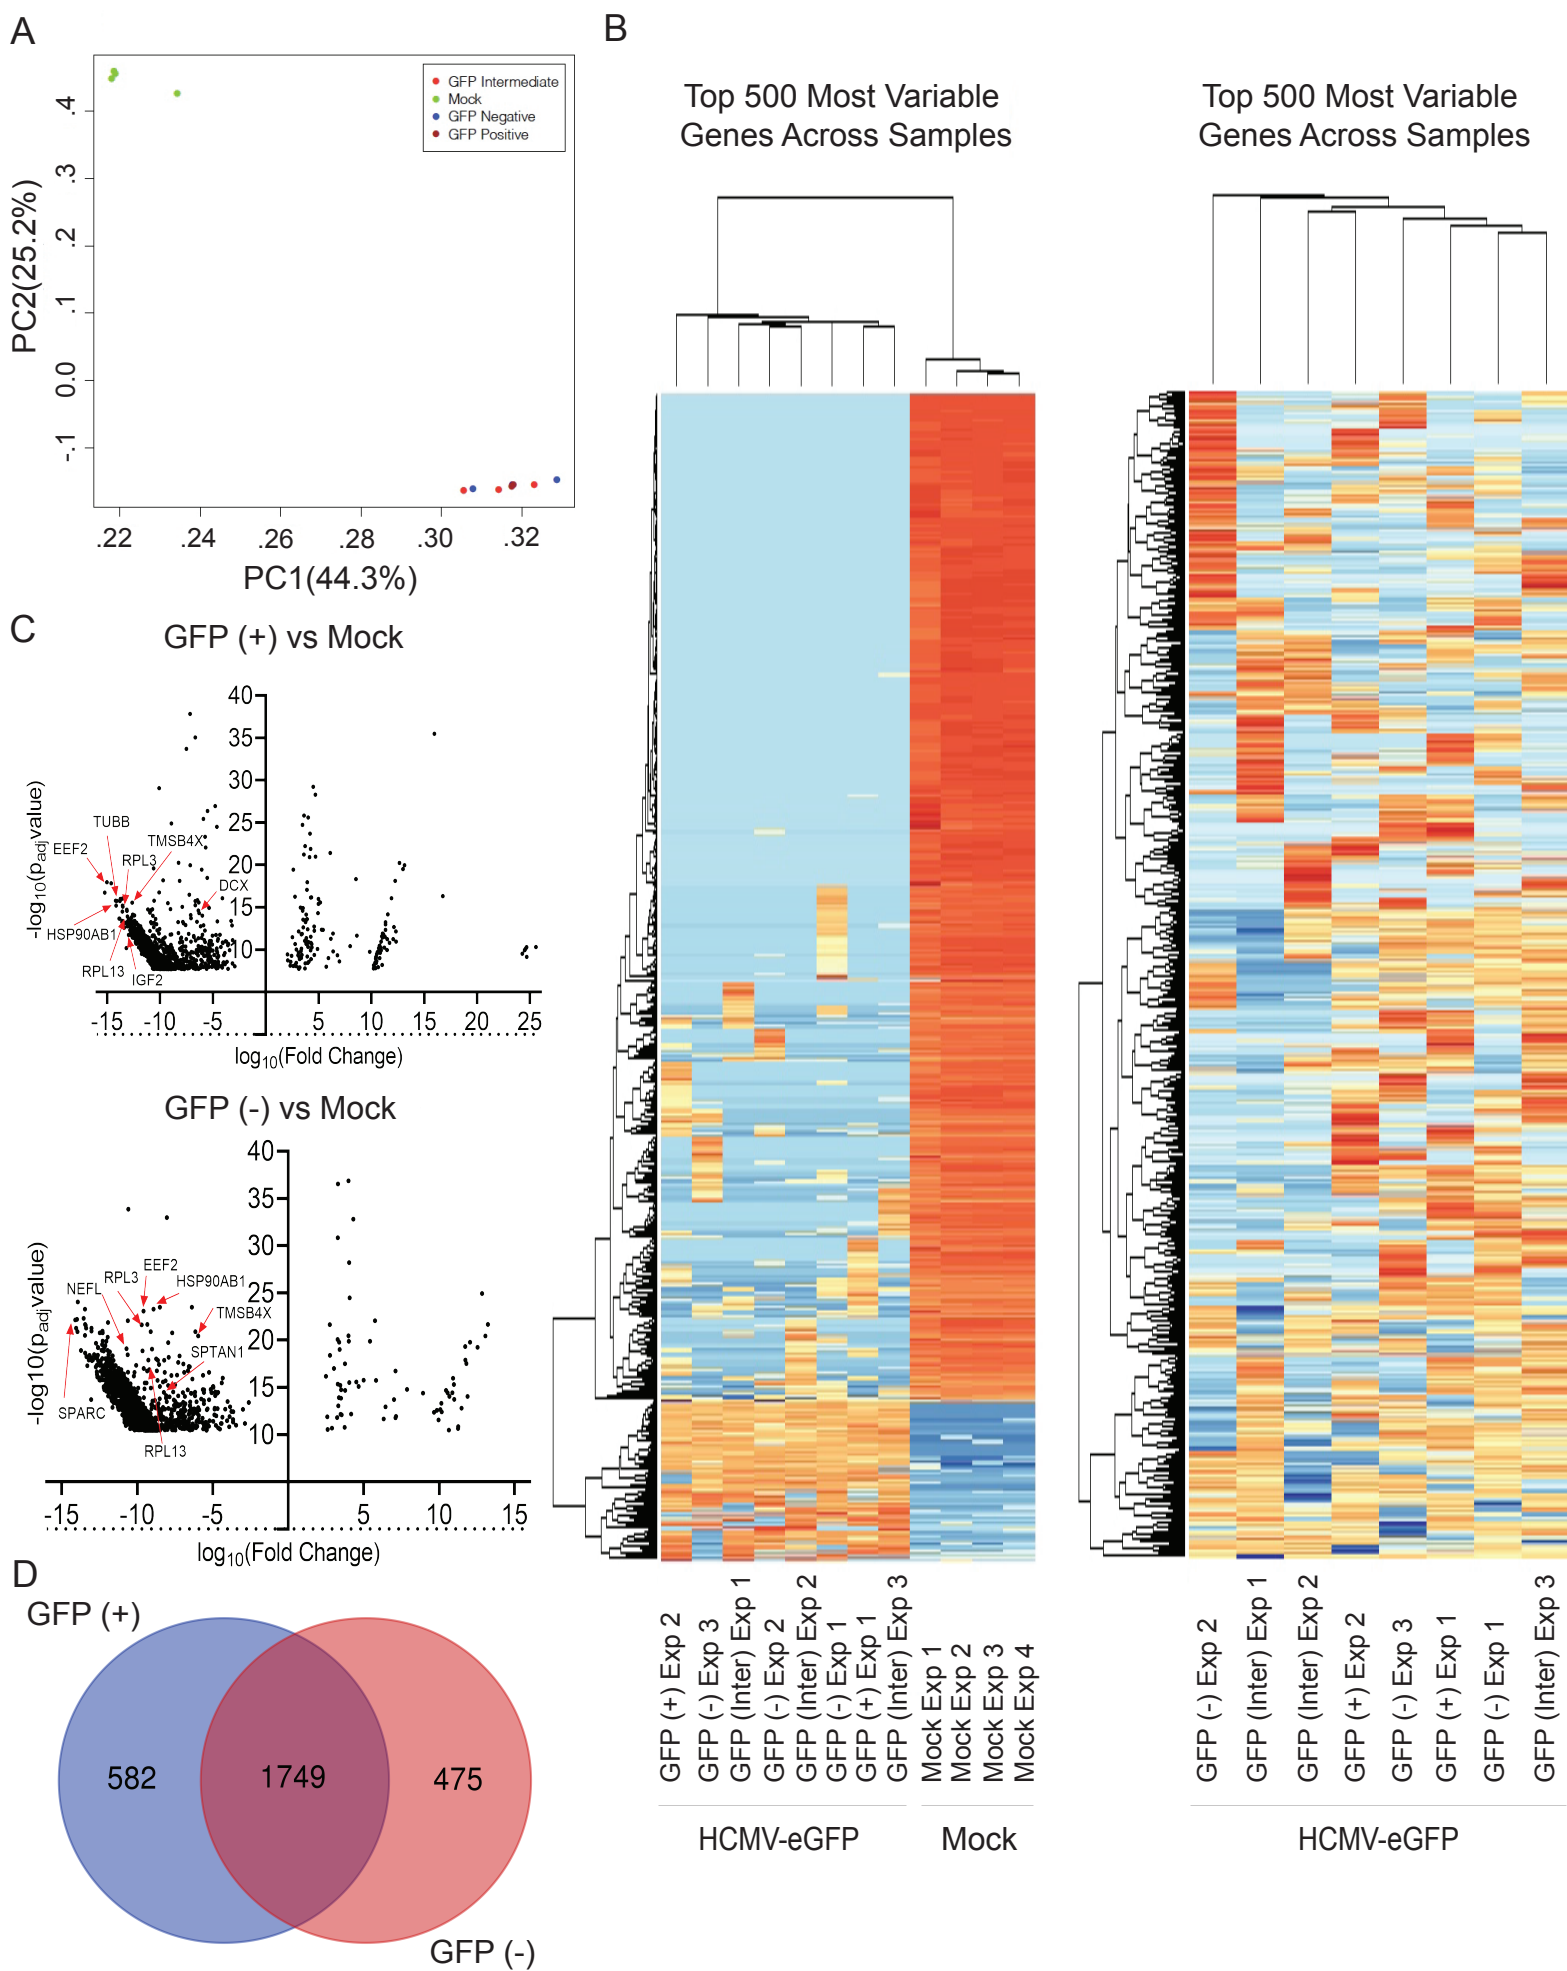

A

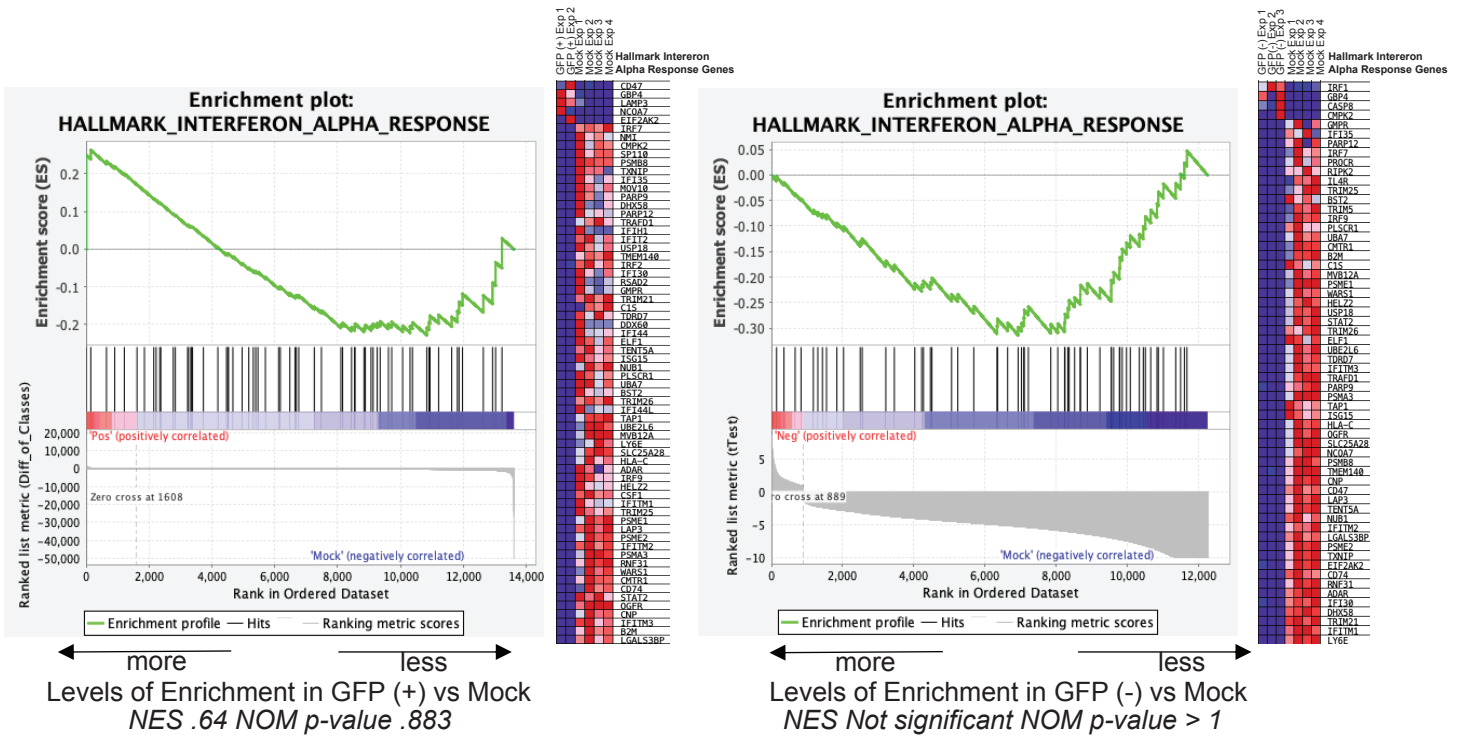

B

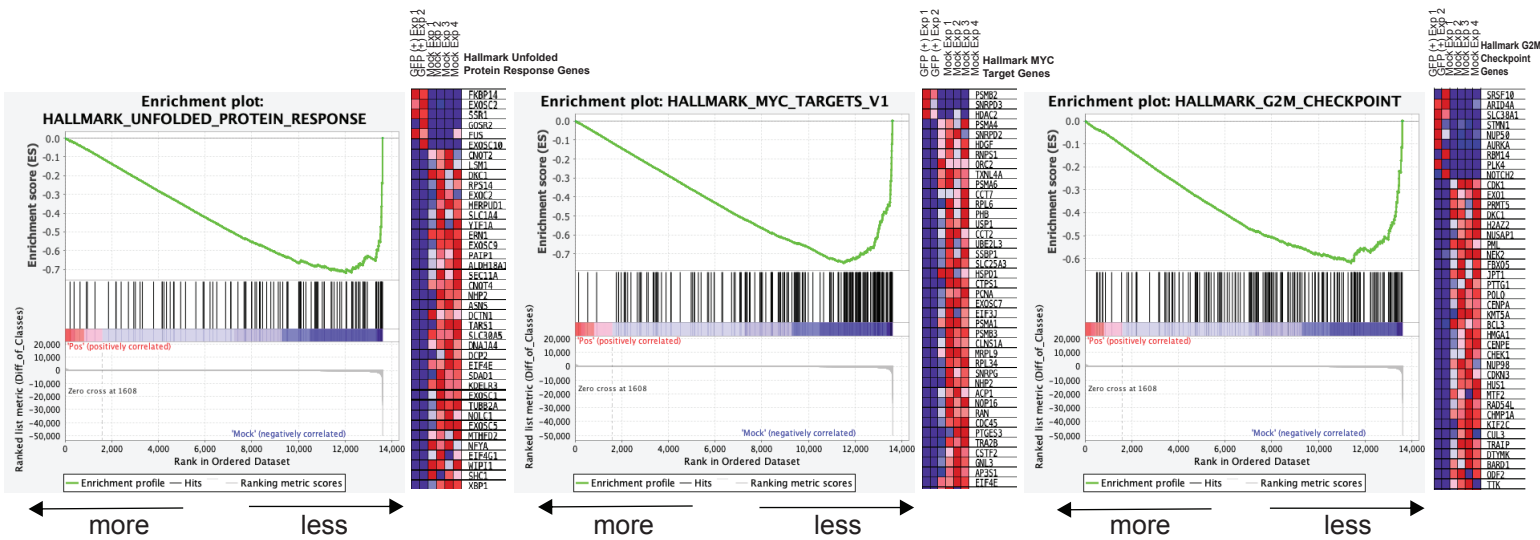

Levels of Enrichment in GFP (+) vs Mock  
 NES -1.37 NOM p-value < .01

NES -1.61 NOM p-value < .01

NES -1.17 NOM p-value < .2

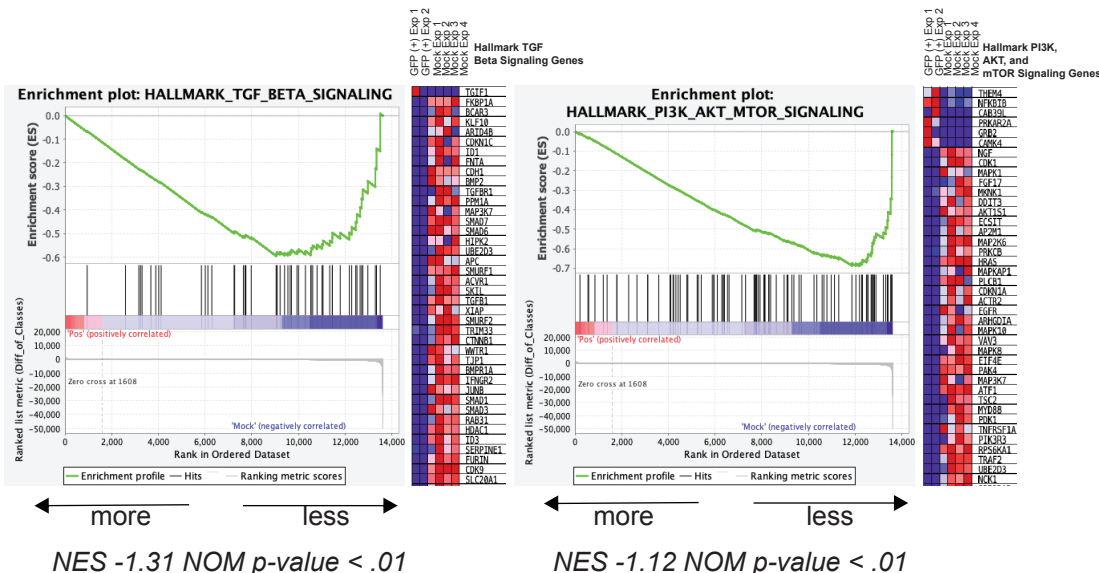

NES -1.31 NOM p-value < .01

NES -1.12 NOM p-value < .01



Figure 4

A

### Gene Ontology Analysis

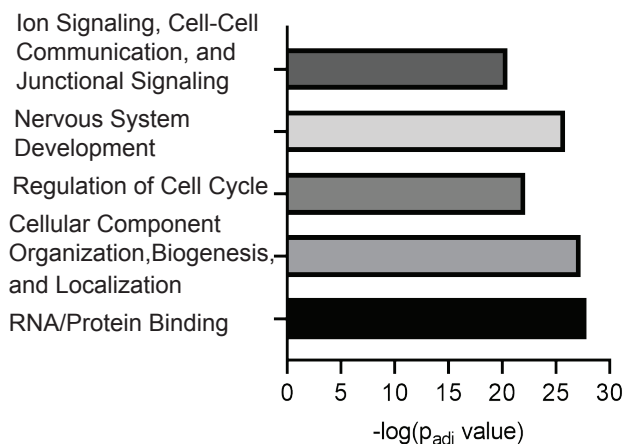

C

### IPA: Affected Canonical Pathways

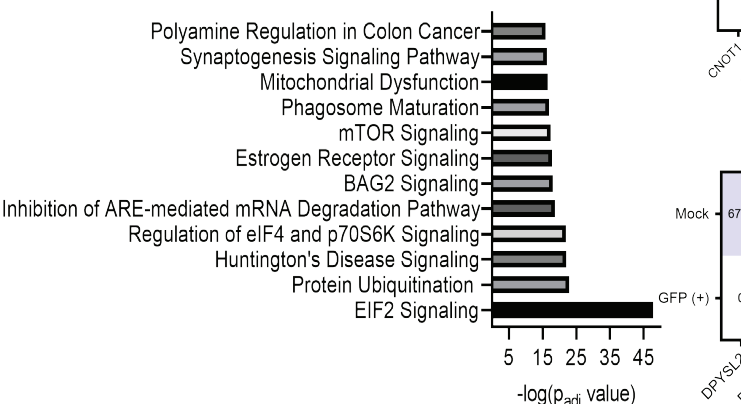

B

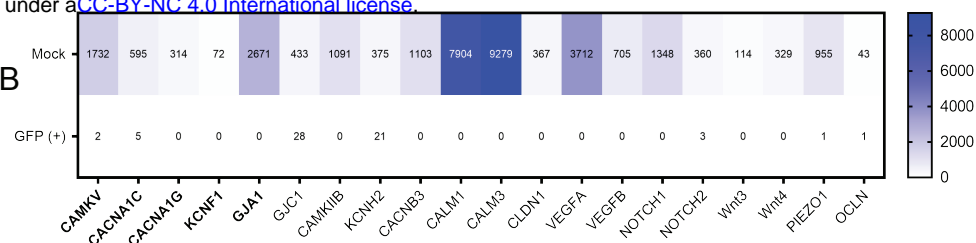

### Nervous System Development

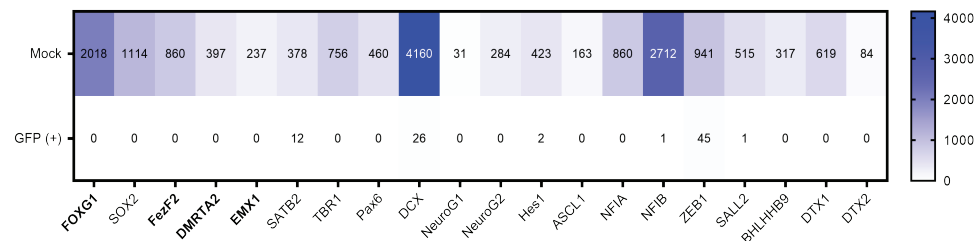

### Regulation of Cell Cycle

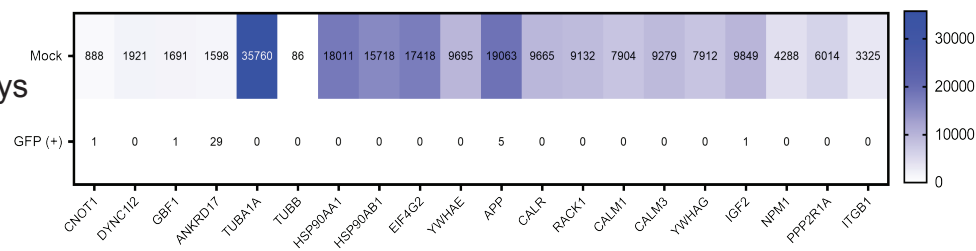

### Cellular Component Organization, Biogenesis, and Localization

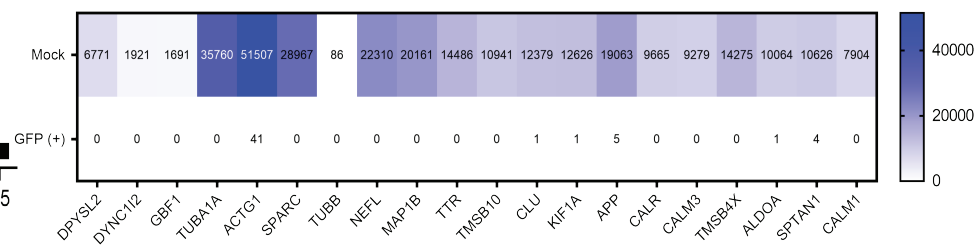

### RNA/Protein Binding

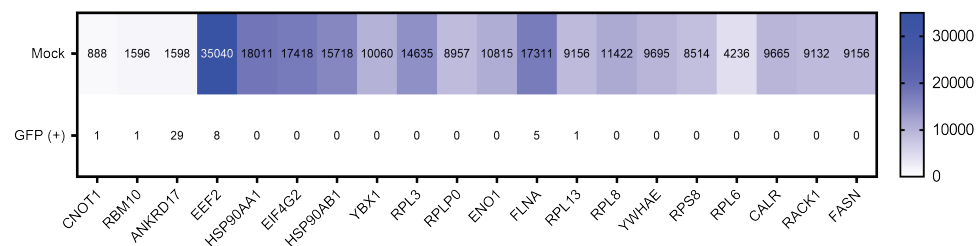

D

### GFP (+) Upregulated Genes

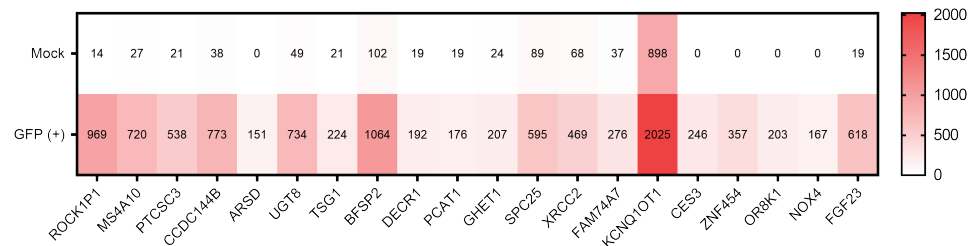

### GFP (+) Upregulated Genes

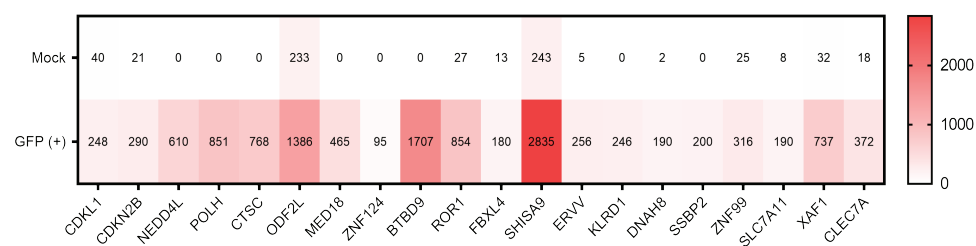

Figure 5

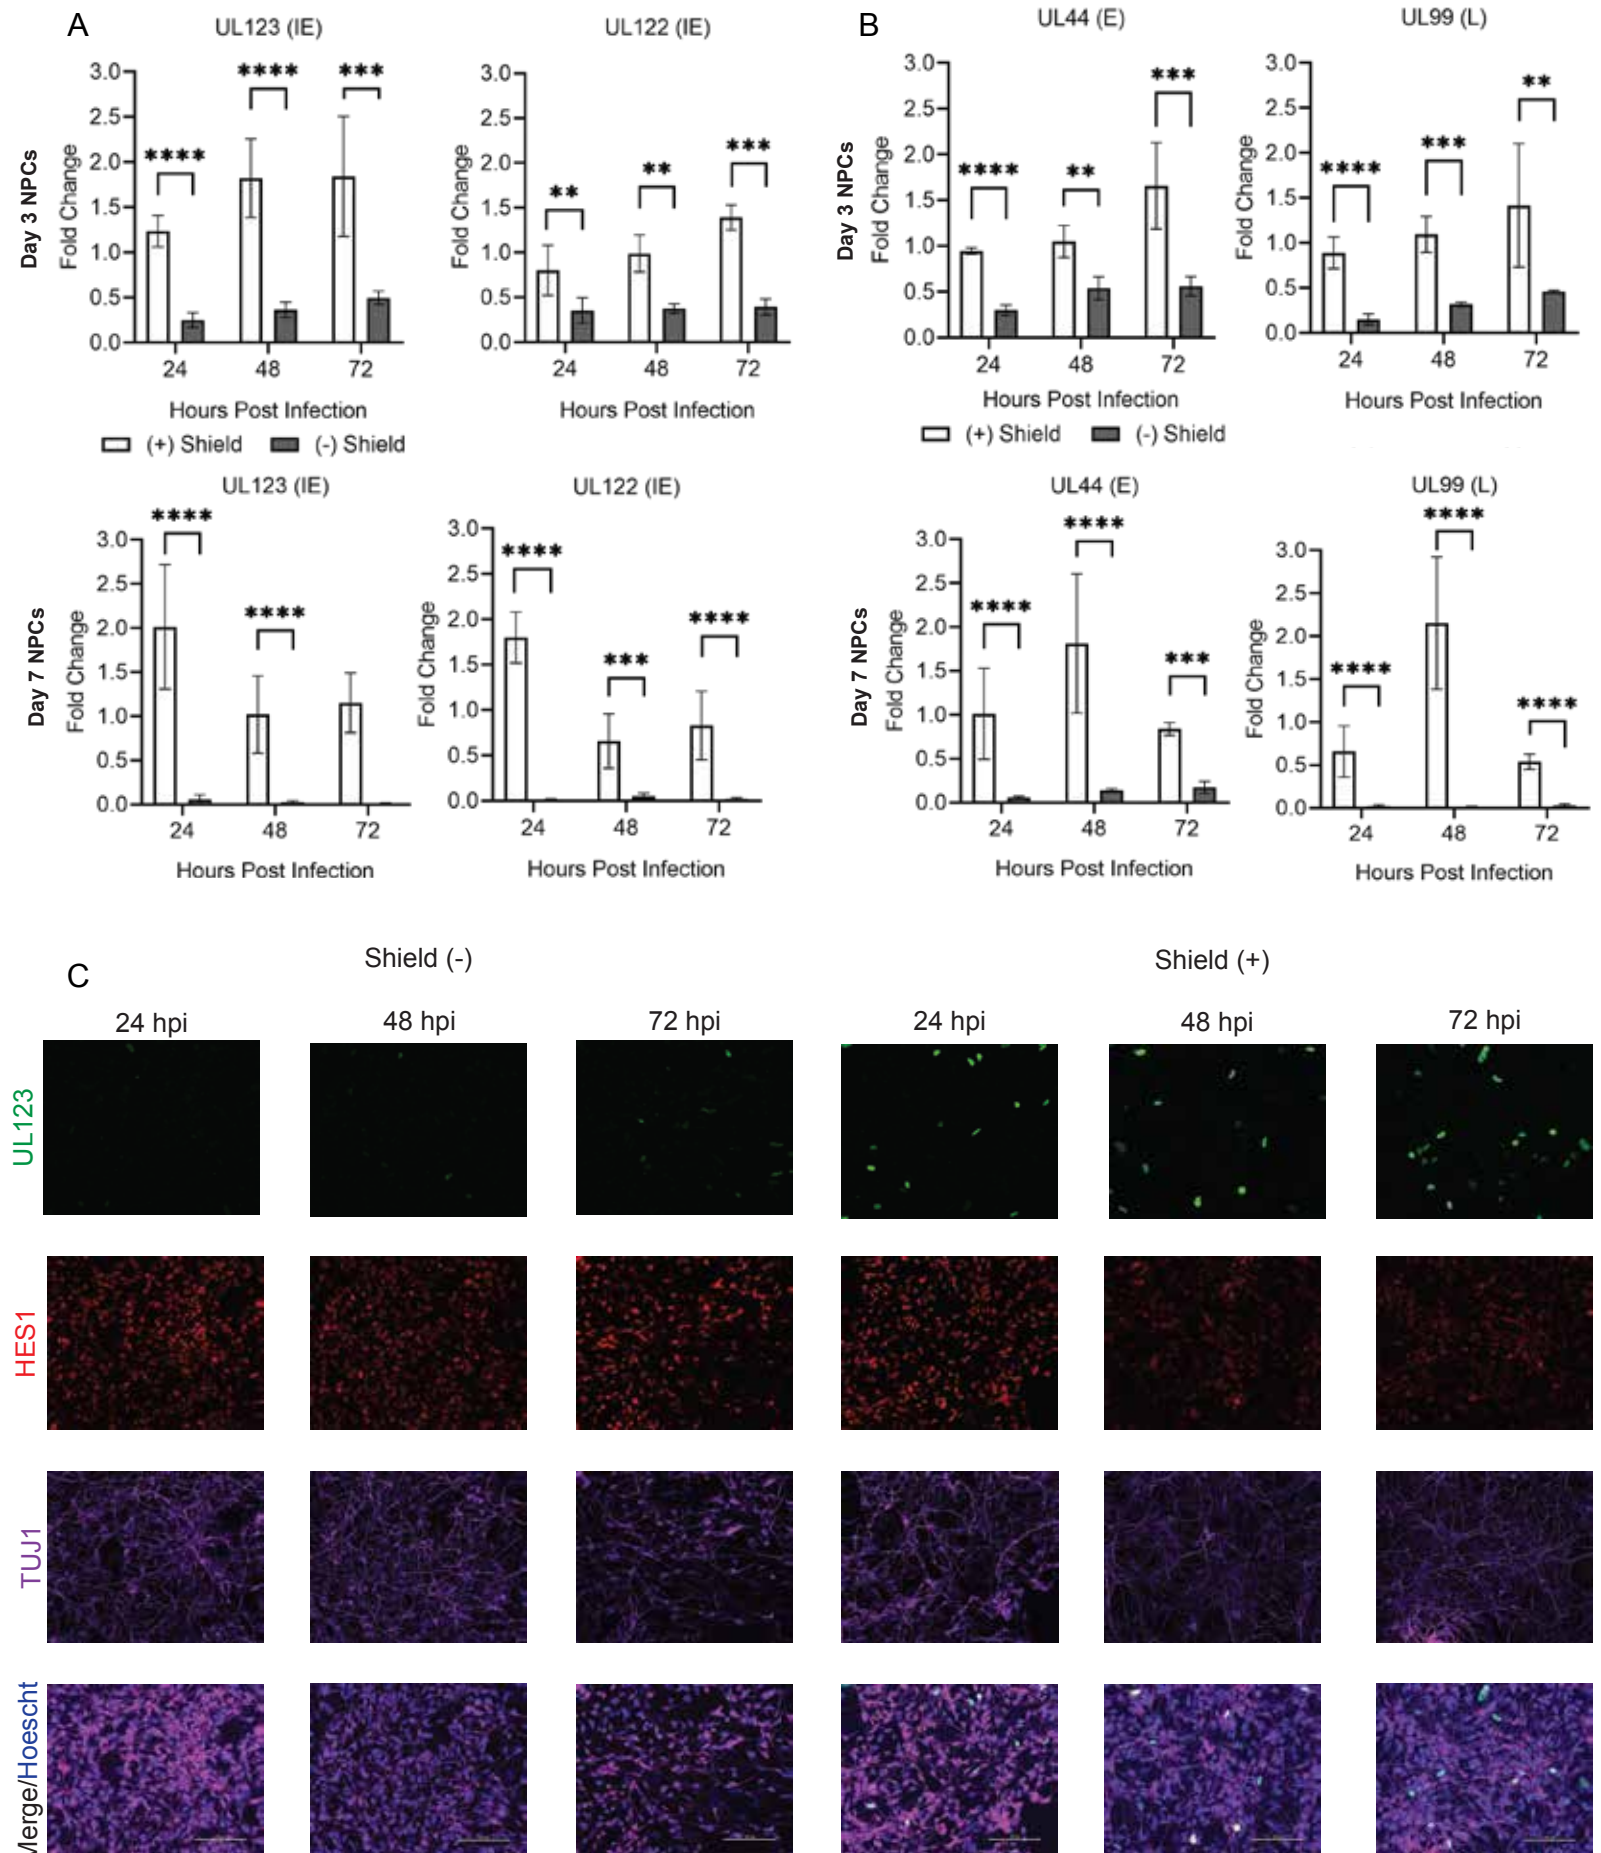

Figure 6

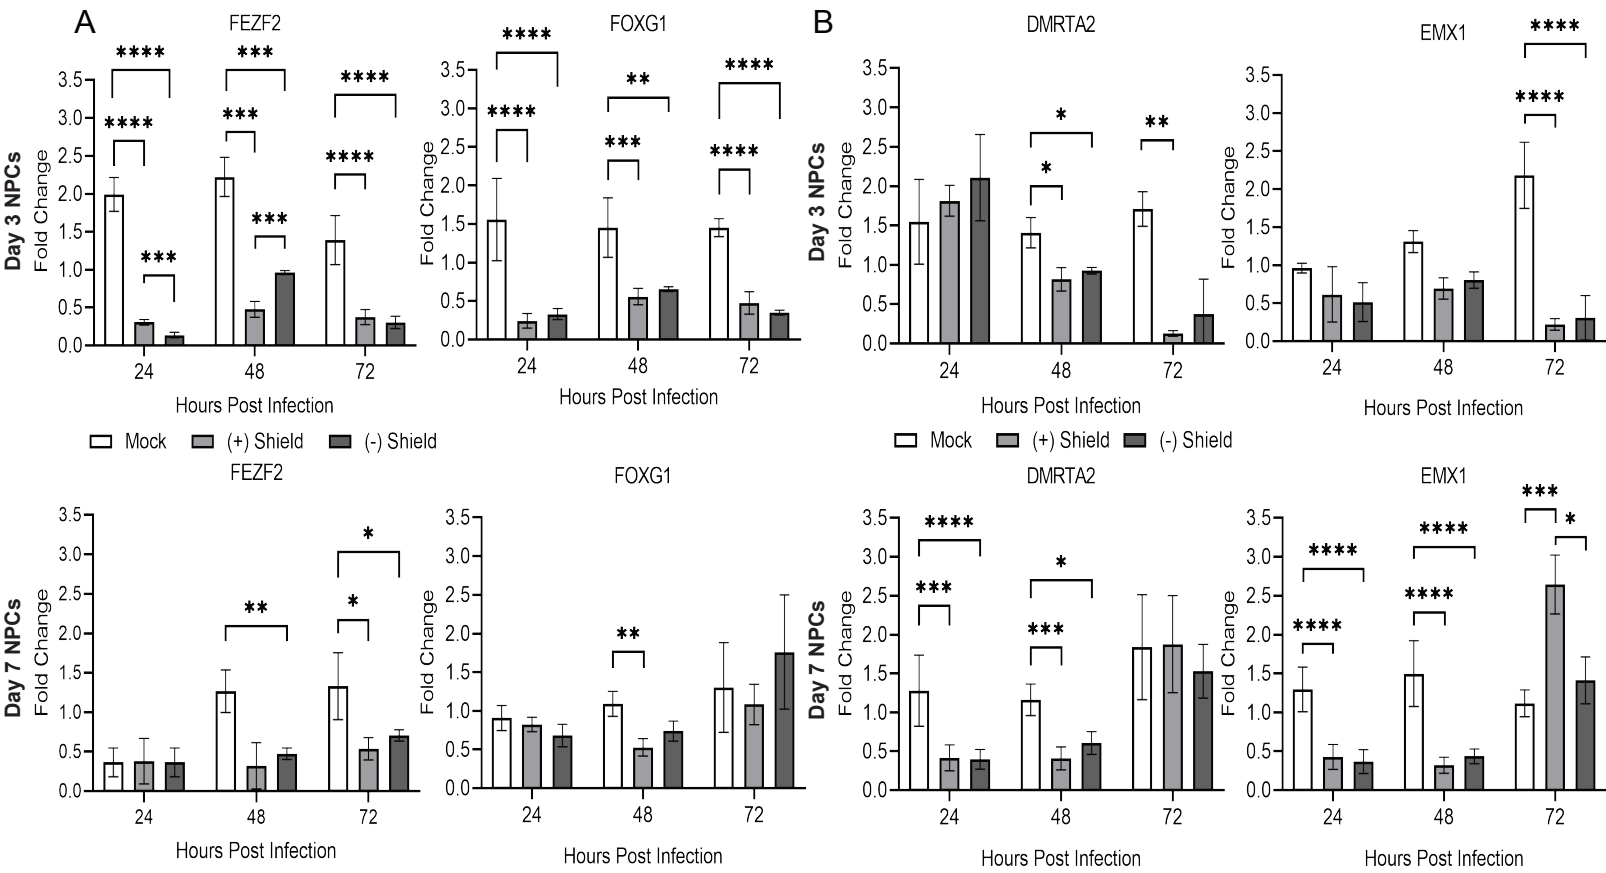

Figure 7

A

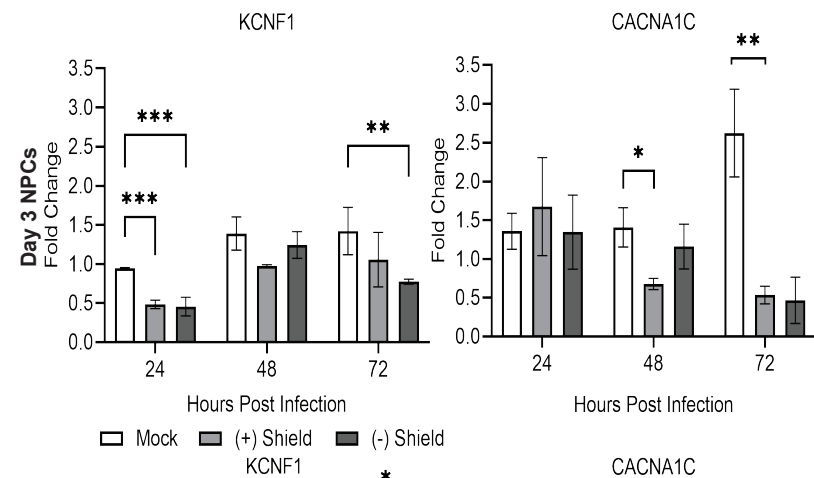

B

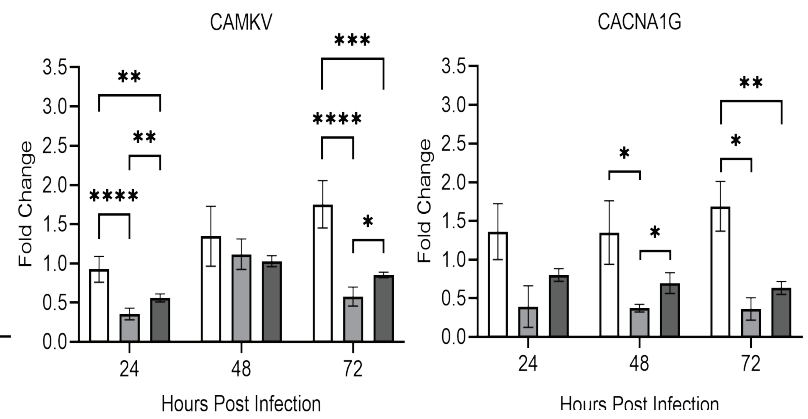

Day 7 NPCs

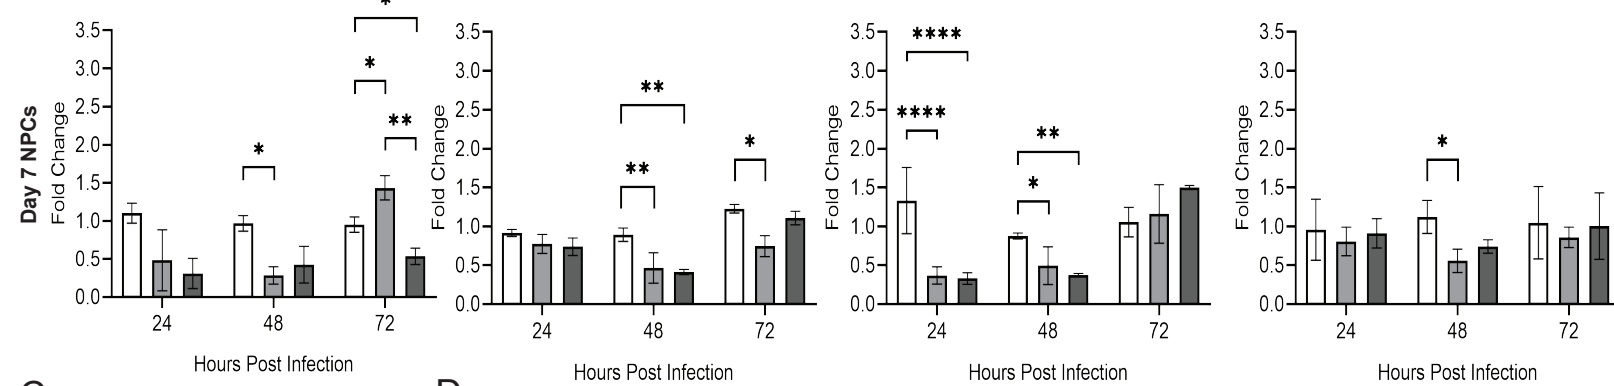

C

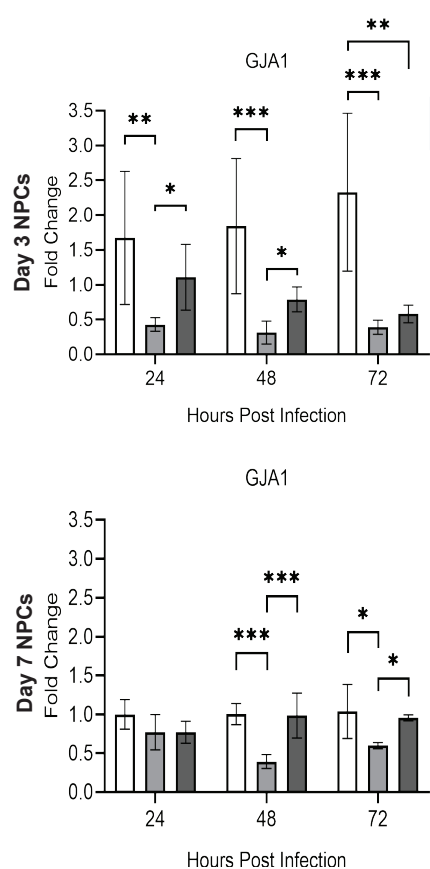

D

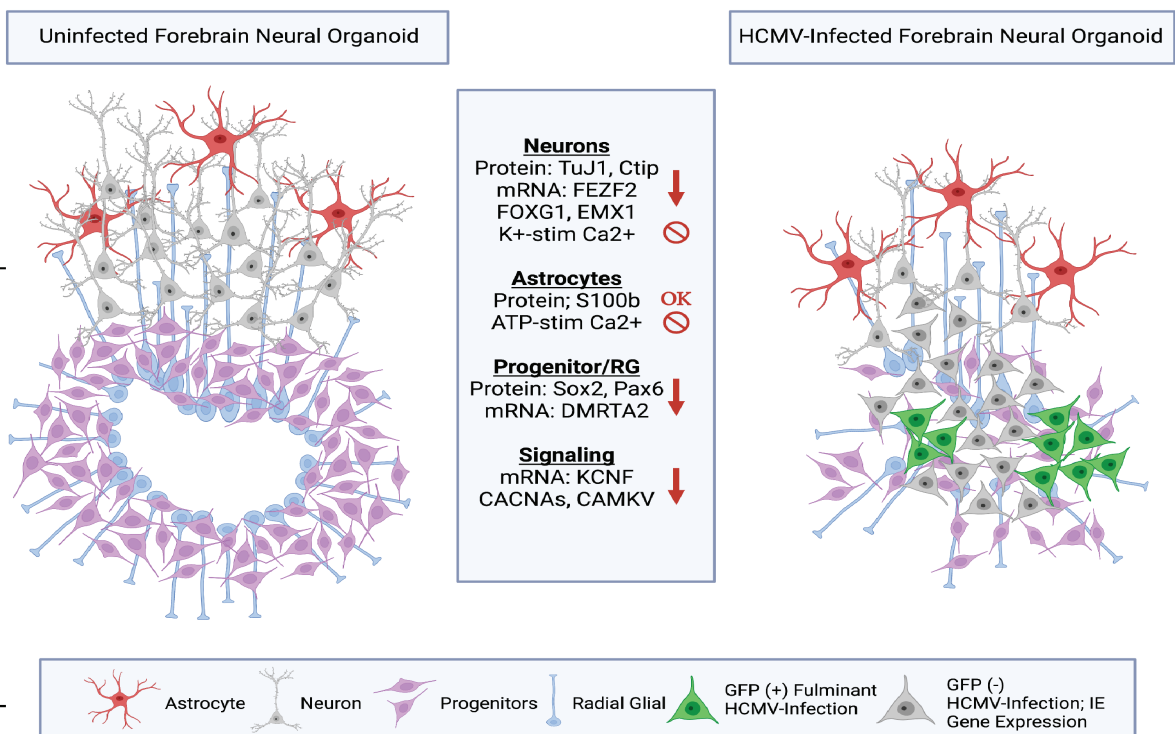

Source: https://www.biorxiv.org/content/10.1101/2021.08.01.454651v1.full.pdf
